# **Connexin Hemichannels with Prostaglandin Release in Anabolic Function of Bone to Mechanical Loading**

Dezhi Zhao<sup>1,2</sup>, Manuel A. Riquelme<sup>1</sup>, Teja Guda<sup>3</sup>, Chao Tu<sup>1,4</sup>, Huiyun Xu<sup>2</sup>, Sumin Gu<sup>1</sup>, and Jean X. Jiang<sup>1\*</sup>

<sup>1</sup>Department of Biochemistry and Structural Biology, University of Texas Health Science Center at San Antonio, TX, USA; <sup>2</sup>School of Life Sciences, Northwestern Polytechnical University, Xian, China; <sup>3</sup>Department of Biomedical Engineering and Chemical Engineering, University of Texas at San Antonio, TX, USA; <sup>4</sup>Department of Orthopedics, The Second Xiangya Hospital, Central South University, Changsha, China.

\*Address correspondence to Dr. Jean X. Jiang, [jiangj@uthscsa.edu](mailto:jiangj@uthscsa.edu).

Address: Department of Biochemistry and Structural Biology, University of Texas Health Science Center, 7703 Floyd Curl Drive, San Antonio, TX 78229-3900, USA

Running title: Hemichannel Function in Mechanical Loading

## 20 **Abstract**

21 Mechanical stimulation, such as physical exercise, is essential for bone formation and health. Here,  
 22 we demonstrate the critical role of osteocytic Cx43 hemichannels in anabolic function of bone in  
 23 response to mechanical loading. Two transgenic mouse models, R76W and  $\Delta$ 130-136, expressing  
 24 dominant-negative Cx43 mutants in osteocytes were adopted. Mechanical loading of tibial bone  
 25 increased cortical bone mass and mechanical properties in wild-type and gap junction-impaired  
 26 R76W mice through increased PGE<sub>2</sub>, endosteal osteoblast activity, and decreased sclerostin. These  
 27 anabolic responses were impeded in gap junction/hemichannel-impaired  $\Delta$ 130-136 mice and  
 28 accompanied by increased endosteal osteoclast activity. Specific inhibition of Cx43 hemichannels by  
 29 Cx43(M1) antibody suppressed PGE<sub>2</sub> secretion and impeded loading-induced endosteal osteoblast  
 30 activity, bone formation and anabolic gene expression. PGE<sub>2</sub> administration rescued the osteogenic  
 31 response to mechanical loading impeded by impaired hemichannels. Together, osteocytic Cx43  
 32 hemichannels could be a potential new therapeutic target for treating bone loss and osteoporosis.  
 33

## 34 **Introduction**

35 Bone as a mechanosensitive tissue is adaptive to mechanical stimuli, which are essential for  
36 bone homeostasis, formation, and remodeling (Bonewald, 2011). Reduced mechanical stimulation  
37 leads to bone loss and elevated risk of fracture (Lang et al., 2004), while enhanced mechanical  
38 stimulation, such as physical exercise, has positive, anabolic impacts on bone tissue, even following  
39 a prolonged cessation of stimulation (Erlandson et al., 2012; Warden et al., 2007). The osteocytes  
40 embedded in the bone mineral matrix comprise over 90–95% of all bone cells and are thought to be a  
41 major mechanoreceptor in the adult skeleton (Bonewald, 2011). Osteocytes detect the mechanical  
42 loading-induced alterations of the bone matrix microenvironment and translate them into biological  
43 responses to regulate osteoblast and osteoclast activity on the bone surface (Bonewald, 2011;  
44 Bonewald and Johnson, 2008).

45 Connexin (Cx)-forming gap junctions and hemichannels permit small molecules ( $\leq 1$  kDa) to  
46 pass through the cellular membrane, such as prostaglandin E<sub>2</sub> (PGE<sub>2</sub>) and ATP (Loiselle et al., 2012).  
47 Among Cx family members, Cx43 is the predominant Cx subtype expressed in osteocytes (Civitelli,  
48 2008). Cx43 gap junctions allow cell-cell communication between osteocytes or between osteocytes  
49 and other bone cell types (Ishihara et al., 2008), and mechanical stimuli increase communication  
50 between two adjacent cells through gap junctions (Alford et al., 2003; Cheng et al., 2001). However,  
51 osteocytic Cx43 gap junctions are only active at the tips of osteocyte dendritic processes and remain  
52 open even without mechanical stimulation (Cusato et al., 2006). In contrast, Cx43 hemichannels,  
53 which mediate the communication between the intracellular and the extracellular microenvironment,  
54 are highly responsive to mechanical stimulation in osteocytes (Cherian et al., 2005; Jiang and

55 Cherian, 2003 ). Our previous studies have shown that *in vitro* mechanical stimulation, through fluid  
56 flow shear stress (FFSS), increases cell surface expression of Cx43 hemichannels (Cherian et al.,  
57 2005; Jiang and Cherian, 2003 ; Siller-Jackson et al., 2008), and opens Cx43 hemichannels, leading  
58 to the release of anabolic factor, PGE<sub>2</sub> in osteocytes (Cherian et al., 2005; Siller-Jackson et al., 2008).  
59 Activation of integrins and PI3K-Akt signaling by FFSS plays an essential role in activating Cx43  
60 hemichannels (Batra et al., 2012; Batra et al., 2014). PGE<sub>2</sub> released by Cx43 hemichannels acts in an  
61 autocrine/paracrine manner to promote gap junction communication through transcriptional  
62 regulation of Cx43 (Xia et al., 2010) and blocks glucocorticoid-induced osteocyte apoptosis (Kitase  
63 et al., 2010). The opening of Cx43 hemichannels by FFSS also triggers the release of ATP by a  
64 protein kinase C-mediated pathway in osteocytes (Genetos et al., 2007). Extracellular PGE<sub>2</sub>  
65 accumulation caused by continuous FFSS exerts a negative feedback, leading to hemichannel closure  
66 (Riquelme et al., 2015). However, the biological role of osteocytic Cx43 hemichannels in the  
67 anabolic function of mechanical loading has remained largely elusive.

68 Several bone cell type-specific Cx43 conditional knockout (cKO) mouse models have been  
69 reported. Deletion of Cx43 from osteoblasts and osteocytes driven by the Col-2.3-kb  $\alpha 1(I)$  collagen  
70 promoter (Col-2.3kb-Cre; Cx43<sup>-/flx</sup>) attenuated tibial endosteal response to non-physiological  
71 mechanical loading, induced by four-point (Grimston et al., 2006) or three-point tibial bending  
72 (Grimston et al., 2008). However, deletion of Cx43 in osteochondroprogenitors driven by the  
73 Dermo1 collagen promoter (Dermo1-Cre; Cx43<sup>-/flx</sup>)(Grimston et al., 2012) or in  
74 osteoblasts/osteocytes driven by the osteocalcin promoter (OCN-Cre; Cx43<sup>flx/flx</sup>)(Zhang et al., 2011)  
75 showed an enhanced tibial periosteal response to tibial axial compression (Grimston et al., 2012) or

tibial cantilever bending (Zhang et al., 2011). Similarly, deletion of Cx43 in osteocytes driven by an 8-kb dentin matrix protein 1 (DMP1) promoter (DMP1-8kb-Cre; Cx43<sup>flx/flx</sup>) showed enhanced  $\beta$ -catenin levels and correspondingly increased periosteal response to ulna compression (Bivi et al., 2013). Interestingly, endosteal bone formation decreased more in Dermo1-Cre; Cx43<sup>-flx</sup> mice (Grimston et al., 2012), but did not change in DMP1-8kb-Cre; Cx43<sup>flx/flx</sup> mice (Bivi et al., 2013) during mechanical loading. Together, these findings suggest that Cx43 plays a distinct role in the adaptive response to bone loading. However, since Cx43 forms both gap junctions and hemichannels, it has remained largely elusive whether the responses in knockout models could be attributed to either or both types of Cx43-forming channels. Here we dissect the distinctive roles of Cx43 gap junctions and hemichannels using two transgenic mouse models that overexpress dominant-negative Cx43 mutants primarily in osteocytes with the 10 kb DMP1 promoter. The R76W transgenic mouse inhibits gap junctions with enhanced hemichannel function, whereas,  $\Delta$ 130–136 inhibits both gap junctions and hemichannels (Xu et al., 2015). To further delineate the role of osteocytic Cx43 hemichannels under mechanical loading *in vivo*, a monoclonal Cx43(M1) antibody that specifically blocks Cx43 hemichannels was developed. In this study, we unveil a novel role of Cx43 hemichannels in osteocytes and their release of PGE<sub>2</sub> in mediating anabolic function of the bone in response to mechanical loading.

## Results

### Impairment of Cx43 hemichannels attenuate anabolic responses of tibial bone to mechanical loading

In this study, we used two transgenic mouse models to distinguish the roles of osteocytic Cx43-gap junction channels and hemichannels in osteocytes in bone response to mechanical loading. We injected EB dye into mouse tail veins to determine the activity of Cx43 hemichannels in WT and transgenic mice in response to axial tibial loading. Bone tissue sections around the tibial midshaft region showed that tibial loading increased EB dye uptake in the osteocytes of WT and R76W mice, but not in the osteocytes of  $\Delta 130$ -136 mice (**Figure 1-figure supplement 2A, B**).

We subjected WT and transgenic mice with similar body weights (**Figure 1-figure supplement 3A**) to a 2-week cyclic tibial loading regime.  $\mu$ CT analyses of tibial metaphyseal trabecular bone showed that loading increased bone volume fractions (BV/TV) in WT and R76W mice (**Figure 1A**). In contrast, compared to contralateral, unloaded controls, tibial loading of  $\Delta 130$ -136 mice exhibited a significant reduction of trabecular number (Tb.N) and bone mineral density (BMD), as well as increased trabecular separation (Tb.Sp) during mechanical loading (**Figure 1B, C, E**). However, compared to contralateral, unloaded tibias, trabecular thickness (Tb.Th) was increased in loaded tibias of WT and two transgenic mice (**Figure 1D**). There was no change of structural model index (SMI), indicating that loading did not affect the shape of trabecular bone (**Figure 1F**). Representative  $\mu$ CT images of trabecular bone are shown in **Figure 1G**.

Similar attenuation of anabolic responses to tibial loading was also observed in cortical bone.  $\mu$ CT analysis was conducted at the midshaft cortical bone (50% site). Loading increased bone area (B.Ar), bone area fraction (B.Ar/T.Ar), and cortical thickness (Ct.Th) in WT and R76W mice (**Figure 2B, C, E**). Although T.Ar was increased by mechanical loading in  $\Delta 130$ -136 (**Figure 2A**), enlarged bone marrow area (M.Ar) (**Figure 2D**) attenuated the ratio of B.Ar/T.Ar (**Figure 2C**). The

increased Ct.Th. due to tibial loading was not observed in  $\Delta 130$ -136 mice (**Figure 2E**). Interestingly, the loading caused a decrease of BMD in R76W mice (**Figure 2F**). Torsional strength, predicted by polar moment of inertia (pMOI), was increased as a result of mechanical loading in WT and R76W, but not in  $\Delta 130$ -136 mice (**Figure 2G**). Representative images of cortical bone are shown in **Figure 2H**. Together these data suggested that osteocytic Cx43 hemichannels, not gap junctions, play an important role in anabolic responses of both trabecular and cortical bones to mechanical loading.

### **Cx43 hemichannels mediate endosteal osteogenic responses to mechanical loading.**

Dynamic histomorphometric analyses were performed to evaluate periosteal and endosteal bone formation in response to tibial loading. Loading caused a significant increase of endosteal MAR, MS/BS, and BRF/BS compared to contralateral tibias in WT and R76W, but such an increase was not observed in  $\Delta 130$ -136 (**Figure 3A-D**). The decreased endosteal bone formation may partially account for the enlarged bone marrow. Contrary to the endosteal surface,  $\Delta 130$ -136 mice showed a statistically significant osteogenic response on the periosteal surface compared to WT and R76W mice, manifesting a threefold increase in MAR, MS/BS, and BRF/BS during loading (**Figure 3E-H**). Together, these data suggested that impaired osteocytic Cx43 hemichannels in  $\Delta 130$ -136 mice attenuated endosteal bone formation, and enhanced periosteal bone formation upon mechanical loading.

### **Impaired Cx43 hemichannels inhibit the loading-induced PGE<sub>2</sub> secretion and osteoblast activity, and promote osteoclast activity.**

139 Cx43 hemichannels mediate PGE<sub>2</sub> release from osteocytes induced by FFSS *in vitro* (Cherian et al.,  
140 2005), and extracellular PGE<sub>2</sub> is reported to play a key role in the anabolic response to mechanical  
141 loading of bone tissue (Jee et al., 1985; Thorsen et al., 1996). We measured PGE<sub>2</sub> levels in the tibial  
142 bone diaphysis and found PGE<sub>2</sub> levels in mechanically loaded tibias were significantly increased in  
143 WT and R76W mice compared to those in contralateral, non-loaded tibias (**Figure 4A**). However,  
144 loading had minimal effect on PGE<sub>2</sub> levels in  $\Delta$ 130-136 mice. Immunohistochemical staining  
145 showed that the expression of cyclooxygenase-2 (COX-2), a key enzyme that catalyzes the  
146 conversion of arachidonic acid to prostaglandins, was significantly increased in the osteocytes of  
147 loaded tibias of WT and R76W mice compared to contralateral, unloaded tibias (**Figure 4B, C and**  
148 **Figure 4-figure supplement 1A**). However, the increase of COX-2 in loaded tibias was not  
149 observed in  $\Delta$ 130-136 mice. Sost-positive osteocytes decreased significantly in WT and R76W in  
150 response to tibial loading, while such decrease in loaded tibias was absent in  $\Delta$ 130-136 mice (**Figure**  
151 **4D, E and Figure 4-figure supplement 1B**). A similar reduction at the mRNA level of the bone was  
152 also found in WT and R76W, but absent in  $\Delta$ 130-136 mice (**Figure 4F**). Since Sost, a Wnt receptor  
153 antagonist, is a potent inhibitor of osteoblastic activity, we examined osteoblasts on the endosteal  
154 surface. WT and R76W mice exhibited an increase of osteoblast numbers on the endosteal surface; in  
155 contrast, this increase was absent in  $\Delta$ 130-136 mice (**Figure 4G, H**). Moreover, the levels of mRNA  
156 of osteoblastic markers Runx2 and Bglap were higher in the bone of loaded WT and R76W than  
157 loaded  $\Delta$ 130-136 mice (**Figure 4I, J**). The mRNA expression of the osteocytic marker Dmp1 in the  
158 bone of  $\Delta$ 130-136 mice showed a similar trend of reduction compared to that of control and R76W  
159 mice (**Figure 4K**). Contrary to osteoblasts, osteoclast number on the endosteal bone surface was



160 significantly increased in loaded tibias in  $\Delta$ 130-136 mice (**Figure 4L-N**). The data suggested that  
 161 osteocytic Cx43 hemichannels influence PGE<sub>2</sub> secretion, key bone marker expression, and  
 162 osteoblastic and osteoclastic activities on endosteal surfaces in response to mechanical loading.  
 163  
 164 **Cx43 hemichannel-blocking antibody impairs the anabolic effects of mechanical loading on**  
 165 **trabecular and cortical bones.**  
 166 We have developed a polyclonal antibody, Cx43(E2), that targets an extracellular loop domain of  
 167 Cx43 and specifically blocks osteocytic Cx43 hemichannels (Siller-Jackson et al., 2008). We  
 168 recently developed a specific mouse monoclonal blocking antibody Cx43(M1) to investigate the  
 169 roles of hemichannels *in vivo*. Gap junction channels and hemichannels were assayed using dye  
 170 coupling (**Figure 5-figure supplement 1A**) and dye uptake assays (**Figure 5-figure supplement**  
 171 **1B**), respectively. Both Cx43(E2) and Cx43(M1) had minimal effects on gap junction channels as  
 172 indicated by comparable levels of dye transfer with red-orange AM dye in MLO-Y4 cells (**Figure**  
 173 **5-figure supplement 1A**). Conversely, FFSS-induced hemichannel opening, as determined by EtBr  
 174 uptake, was inhibited by Cx43(E2) and Cx43(M1) antibodies in MLO-Y4 cells (**Figure 5-figure**  
 175 **supplement 1B**). The extent of inhibition is comparable between Cx43(E1) and Cx43(M1)  
 176 antibodies. To ensure antibody delivery to osteocytes, we labeled tibial bone sections with a  
 177 rhodamine-conjugated anti-mouse secondary antibody. Strong antibody signals were primarily  
 178 detected in osteocytes in cortical bone for Cx43(M1)-injected mice, but not in IgG-injected ones  
 179 (**Figure 5-figure supplement 1C**). Interestingly, low levels of Cx43(M1) were detected in trabecular  
 180 bone (**Figure 5-figure supplement 1D**). The hemichannel opening detected by EB fluorescence was

181 found only in loaded tibial bone, and this uptake was almost completely blocked by the Cx43(M1)  
182 antibody (**Figure 5-figure supplement 1E, F**). Hence, these studies established the feasibility of  
183 using Cx43(M1) antibody to assess the role of Cx43 hemichannels *in vivo* using the tibial loading  
184 model.

185 WT mice with similar body weight (**Figure 5-figure supplement 2A**) were randomly allocated  
186 to Cx43(M1) or vehicle groups. A slight decline in body weight was found during the first week of  
187 the study, but was stabilized by the second week (**Figure 5-figure supplement 2A**). The antibody  
188 had a negligible effect on body weight (**Figure 5-figure supplement 2A**).  $\mu$ CT analysis of tibial  
189 metaphyseal trabecular bone showed that Cx43(M1) treatment significantly abated the  
190 loading-induced increase of Tb.N and decrease of Tb.Sp (**Figure 5B, C**) as compared to the  
191 vehicle-treated group, while Cx43(M1) did not manifest significant differences in the Tb.Th, BV/TV,  
192 and BMD, in response to loading (**Figure 5D-F**). There was no change of SMI in both Cx43(M1) or  
193 vehicle groups (**Figure 5G**). Representative images of trabecular bone are shown in **Figure 5A**.

194 Cx43(M1) treatment attenuated the anabolic response to mechanical loading in midshaft cortical  
195 bone. The increase of B.Ar, B.Ar/T.Ar and Ct.Th by tibial loading was attenuated in the  
196 Cx43(M1)-treated group (**Figure 5J, K, M**), and consequently, the increase of pMOI was also  
197 attenuated in this group (**Figure 5O**). Similar to  $\Delta$ 130-136 mice, larger M.Ar and lower B.Ar/T.Ar  
198 ratios were found in loaded tibias of the Cx43(M1)-treated group when compared to the vehicle  
199 group (**Figure 5K, L**). Although Cx43(M1) further increased T.Ar by mechanical loading (**Figure**  
200 **5I**), enlarged M.Ar (**Figure 5L**) significantly reduced the ratio of B.Ar/T.Ar (**Figure 5K**). Thus,  
201 Ct.Th did not increase and was even lower in loaded tibia compared to vehicle loaded tibias (**Figure**

**5M**). However, BMD was not changed by mechanical loading (**Figure 5N**). Three-point bending analyses revealed a significant increase of elastic modulus and stiffness only in the vehicle group (**Figure 5P, Q**). For loaded tibias, the elastic modulus and ultimate stress in the vehicle group were greater than the Cx43(M1) group (**Figure 5P, R**). Mechanical loading did not change ultimate force in either vehicle or Cx43(M1)-treated group (**Figure 5S**). Representative images of cortical bone are shown in **Figure 5H**. These results are consistent with those obtained from  $\Delta 130$ -136 mice, suggesting the critical roles of Cx43 hemichannels in the anabolic effects of mechanical loading of cortical bone.

# **Blocking Cx43 hemichannels by Cx43(M1) inhibits the load-induced increase in midshaft endosteal osteogenesis.**

Bone formation in response to tibial loading was evaluated in vehicle and Cx43(M1)-treated mice. The vehicle group exhibited increased endosteal MAR, MS/BS, and BRF/BS compared to contralateral, unloaded controls, whereas this response was absent in the Cx43(M1) group (**Figure 6A-D**). In contrast, loading increased bone formation in vehicle and Cx43(M1)-treated groups on the periosteal surface (**Figure 6E-H**). Cx43(M1) treatment induced a greater increase in periosteal MS/BS (**Figure 6G**). The results showed that impaired Cx43 hemichannels attenuated endosteal bone formation, but enhanced periosteal bone formation, induced by mechanical loading.

# **Blocking Cx43 hemichannels by Cx43(M1) impedes the loading-induced increased PGE<sub>2</sub> secretion, bone marker expression, and endosteal osteoblastic activity, and decreased osteoclastic activity.**

223 Tibial loading significantly increased PGE<sub>2</sub> expression in tibial bone, and this increase was not  
 224 observed with Cx43(M1) antibody treatment (**Figure 7A**). Immunohistochemical staining of tibial  
 225 cortical bone showed a significant increase of COX-2 positive osteocytes by mechanical loading, and  
 226 such increase was not detected in the Cx43(M1)-treated group (**Figure 7B, C and Figure 7-figure**  
 227 **supplement 1A**). COX-2 bone mRNA levels detected by RT-qPCR exhibited close to a 5-fold  
 228 increase due to tibial loading, and this increase was not detected in Cx43(M1) treated bone samples  
 229 (**Figure 7D**). Loading caused a significant decrease of Sost-positive osteocytes in tibial bone in the  
 230 vehicle group, and Cx43(M1) antibody abated the load-induced decrease of Sost-positive osteocytes  
 231 (**Figure 7E, F and Figure 7-figure supplement 1B**). Sost bone mRNA also showed a significant  
 232 decrease due to loading in the vehicle group compared to the Cx43(M1)-treated group (**Figure 7G**).  
 233 We next determined another mechanical response protein,  $\beta$ -catenin expression, in osteoblasts. Tibial  
 234 loading resulted in a robust increase in endosteal  $\beta$ -catenin-positive osteoblasts and tibial  $\beta$ -catenin  
 235 gene expression in the vehicle group; in contrast, such increase was absent in the Cx43(M1) group  
 236 (**Figure 7H-J and Figure 7-figure supplement 1C**). Consistent with  $\beta$ -catenin expression,  
 237 endosteal osteoblast number only increased in the vehicle group (**Figure 7K, L**). Moreover, the  
 238 increase of gene expression of the osteoblastic marker, Bglap, was greater in the bone of the vehicle  
 239 group compared to the Cx43(M1) group (**Figure 7M**). Interestingly, increased osteoclast activity was  
 240 also found in the Cx43(M1) group (**Figure 7K, N, O**). The results showed that under mechanical  
 241 loading, inhibition of Cx43 hemichannels by Cx43(M1) antibody impedes the PGE<sub>2</sub> release and Sost  
 242 decrease in osteocytes. This was associated with inhibited  $\beta$ -catenin and Bglap expression and  
 243 osteoblast activity on the endosteal surface.

244

245 **PGE<sub>2</sub> rescues impeded osteogenic responses to mechanical loading by impaired Cx43**  
 246 **hemichannels.**

247 Intermittent PGE<sub>2</sub> treatment has been reported to increase both trabecular and cortical bone mass (Jee  
 248 et al., 1985; Tian et al., 2007). To explore whether the attenuated anabolic function of bone to  
 249 mechanical loading with Cx43(M1) is caused by inhibited PGE<sub>2</sub> released by Cx43 hemichannels,  
 250 PGE<sub>2</sub> was IP injected into the vehicle control and Cx43(M1) treated mice. The mice in the control  
 251 and treated groups had comparable body weights to minimize variations in tibial bone sizes before  
 252 loading (**Figure 8-figure supplement 1A**).  $\mu$ CT analysis showed that there was no difference in  
 253 trabecular morphometric parameters among the four groups (**Figure 8-figure supplement 2**).  
 254 Contrary to trabecular bone, PGE<sub>2</sub> treatment impeded the significant reduction of B.Ar/T.Ar ratio,  
 255 decreased M.Ar and increased Ct.Th in Cx43(M1)-treated loaded tibias, although there were no  
 256 significant differences in T.Ar, B.Ar, and BMD in all four groups (**Figure 8B-G**). Representative  
 257 images of cortical bone are shown in **Figure 8A**. Interestingly, PGE<sub>2</sub> did not further enhance  
 258 anabolic bone responses in control, loaded mice. Together, these results demonstrate that  
 259 administration of PGE<sub>2</sub> significantly rescues impeded anabolic responses of cortical bone to  
 260 mechanical loading as a result of Cx43 hemichannel inhibition.

261

## 262 **Discussion**

263 In this study, we unveiled the distinctive roles of two types of Cx43 channels in responses to  
 264 mechanical loading using both transgenic mouse models and Cx43 hemichannel-blocking antibodies,

and demonstrated the critical role of Cx43 hemichannels in mediating the anabolic, or bone forming, function of bone upon mechanical loading. Moreover, PGE<sub>2</sub>, a factor released by Cx43 hemichannels in response to mechanical stimulation, rescued the impeded anabolic effects on bone by tibial loading as a result of impaired hemichannels.

We determined bone structural and biomechanical properties, new bone formation, and metabolism using an established bone mechanical loading model, axial tibial compression, in two transgenic mouse models expressing Cx43 dominant negative mutants R76W and  $\Delta$ 130-136 in osteocytes. We observed that  $\Delta$ 130-136 mice, with inhibited osteocytic Cx43 hemichannels, attenuated anabolic bone responses to mechanical loading in both trabecular and cortical bones. The attenuation of bone formation and osteoblastic activities primarily occurred on the tibial endosteal surface, while increased bone formation was observed on the periosteal surface. The activities of osteoblasts and osteoclasts on periosteal and endosteal surfaces, respectively, lead to an enlarged bone marrow area and decreased bone to tissue area ratio. Due to impaired osteocytic gap junction channels and hemichannels in  $\Delta$ 130-136 mice, but only impaired gap junction channels in R76W mice, we postulated that osteocytic Cx43 hemichannels, not gap junctions in osteocytes, are likely to play a predominant role in anabolic bone response to mechanical loading.

The role of Cx43 hemichannels was further validated by the Cx43(M1) antibody, a potent monoclonal antibody that effectively inhibits osteocytic Cx43 hemichannels both *in vitro* and *in vivo*. Remarkably, treatment with Cx43(M1) only twice in a span of two weeks significantly attenuated anabolic effects to mechanical loading, with greater effects in cortical bones. Interestingly, Cx43(M1) treatment not only attenuated, but even reversed anabolic effects in cortical bone, similar to

286  $\Delta$ 130-136 mice. A similar impediment of the rate of bone formation and mineral apposition to tibial  
 287 loading was observed on the endosteal surface with Cx43(M1) treatment. Previous studies have  
 288 shown that cortical bone modeling/remodeling is more pronounced at the endosteal surface (Birkhold  
 289 et al., 2017), and mature bones respond to mechanical loading through changes on endosteal surfaces  
 290 (Bass et al., 2002). Similar findings were also noted in Cx43 cKO mouse models; mice lacking Cx43  
 291 in osteoblasts and osteocytes showed an attenuated increase in endosteal bone formation during  
 292 four-point or three-point tibial bending (Grimston et al., 2008; Grimston et al., 2006). Mice lacking  
 293 Cx43 in osteochondroprogenitors showed a greater extent of decrease in endosteal formation during  
 294 tibial compression loading (Grimston et al., 2012). In our study, notably, endosteal MAR and  
 295 BFR/BS were not responsive to tibial loading in  $\Delta$ 130-136 mice and the Cx43(M1) group,  
 296 suggesting not only increased osteoblastic activity, but also that increased osteoblast number was  
 297 impeded by the impairment of Cx43 hemichannels. Moreover, histomorphometric analysis further  
 298 confirmed a lack of response in osteoblast number and marker genes in  $\Delta$ 130-136 mice and  
 299 Cx43(M1)-treated mice. The difference between Cx43 cKO and our transgenic models and Cx43(M1)  
 300 treatment could be caused by aberrant, compensatory effect of other pathways as a result of Cx43  
 301 deletion. Thus, our results suggest that axial compression loading promotes osteoblast recruitment  
 302 and differentiation on the endosteal surface, an anabolic effect likely mediated by mechanosensitive  
 303 Cx43 hemichannels.

304 Interestingly, contrary to our hypothesis, axial load increased periosteal bone formation and total  
 305 tissue area on the tibial midshaft in  $\Delta$ 130-136 mice. This observation was also reported in cKO  
 306 mouse models with Cx43 deletion in osteoblasts and osteocytes under tibial axial compression

(Grimston et al., 2012) and tibial cantilever bending (Zhang et al., 2011). Similarly, deletion of Cx43 in osteocytes also showed an enhanced periosteal response to ulnar compression (Bivi et al., 2013). The enhanced periosteal bone formation was further observed when hemichannels were inhibited by Cx43(M1). These results posit the role of Cx43 hemichannels in periosteal bone formation during mechanical loading. Our previous study showed that  $\Delta 130$ -136 mice have more periosteal bone apposition than WT and R76W mice, suggesting that periosteal osteoblasts in  $\Delta 130$ -136 mice are more active and sensitive than WT and R76W mice (Xu et al., 2015). Thus, osteocytic Cx43 hemichannels exert differential roles in controlling osteogenic osteoblastic activities on periosteal and bone resorbing osteoclastic activity on endosteal surfaces, respectively. The consequence of the disruption of coordinated activities by hemichannel inhibition results in an enlarged bone marrow cavity. This is likely an adaptive response due to compromised cortical bones resulting from impaired hemichannels and consequently lower extracellular PGE<sub>2</sub>. From a mechanical point of view, increased bone marrow area and cortical bone size allow the bone to respond to high stress levels (Sharir et al., 2008). Thus, the role of osteocytic Cx43 hemichannels in regulating the osteogenic response on endosteal surfaces is distinct from its role on periosteal surfaces.

Besides cortical bone, the anabolic response of trabecular bone to tibial loading in  $\Delta 130$ -136 mice was also attenuated or even reversed, as observed in trabecular number, separation and bone density. However, the compromised response of trabecular bone to mechanical loading was less evident in Cx43(M1) treated mice, except for trabecular number and trabecular separation. One possible explanation is that the accessibility and binding of the antibody to osteocytes in trabecular bone may not be as efficient as in cortical bone. Indeed, we could clearly detect Cx43(M1) on the



surface of osteocytes in cortical bone. However, the binding in trabecular bone is much weaker than that in cortical bone. Since Haversian canals containing blood vessels provide supply to the osteocytes in cortical, but not in trabecular bone (Dahl and Thompson, 2011), it is plausible that the delivery of Cx43(M1) to the bone is mediated primarily by the Haversian canal system.

Previous studies have reported that *in vitro* Cx43 hemichannel opening induced by FFSS mediates the release of PGE<sub>2</sub> (Cherian et al., 2005), a critical factor for anabolic function of bone in response to mechanical loading (Jee et al., 1985; Thorsen et al., 1996). On the contrary, PGE<sub>2</sub> release by FFSS is inhibited by a potent hemichannel-blocking rabbit polyclonal antibody Cx43(E2) (Siller-Jackson et al., 2008). Here, we found that PGE<sub>2</sub> levels and osteocytic COX-2 expression were increased by tibial loading in WT and R76W mice, but such an increase was not detected in  $\Delta$ 130-136 mice. The use of hemichannel-blocking monoclonal Cx43(M1) antibody further confirmed the role of the hemichannels in the release of PGE<sub>2</sub> in bone *in situ*. In accordance with our observation, the reduced release of PGE<sub>2</sub> was reported in calvarial cells isolated from Cx43 cKO mice driven by the Col-2.3-kb  $\alpha$ 1(I) collagen promoter after mechanical stretching (Grimston et al., 2006). The increase in *Cox-2* gene expression in Cx43 cKO mice driven by the 8-kb DMP1 promoter is attenuated after axial tibial compression (Grimston et al., 2012).

We showed that inhibited release of PGE<sub>2</sub> in  $\Delta$ 130-136 mice and in the Cx43 (M1) group was accompanied by an attenuated endosteal bone response to mechanical loading. Moreover, PGE<sub>2</sub> injection rescued the anabolic responses of cortical bone to mechanical loading impeded by Cx43(M1), including the ratio of bone area to tissue area, cortical thickness, and bone marrow area. PGE<sub>2</sub> is a skeletal anabolic factor, and its synthesis and release are highly responsive to mechanical

349 stimulation in osteocytes (Cherian et al., 2005; Jiang and Cherian, 2003 ). Using the microdialysis  
 350 technique, a rapid and significant increase of PGE<sub>2</sub> levels in the proximal tibial metaphysis was  
 351 observed in response to dynamic mechanical loading in healthy women (Thorsen et al., 1996).  
 352 Furthermore, intermittent PGE<sub>2</sub> treatment increases endosteal bone formation (Jee et al., 1985) and  
 353 bone mass (Tian et al., 2007). Conversely, inhibition of PGE<sub>2</sub> by a COX-2 inhibitor blocks endosteal  
 354 tibial bone formation induced by mechanical loading in rats (Forwood, 1996). Here, we demonstrate  
 355 that PGE<sub>2</sub> is indeed involved in the anabolic action of hemichannels in response to mechanical  
 356 loading. Interestingly, PGE<sub>2</sub> administration did not provide an additional increase in the cortical bone  
 357 of mice in loaded vehicle control group. It is likely that extracellular PGE<sub>2</sub> released by osteocytes by  
 358 normal exercise (mechanical loading) is sufficient to promote bone formation and additional  
 359 extracellular PGE<sub>2</sub> would not further increase cortical bone mass.

360 Increased PGE<sub>2</sub> by mechanical stimuli is reported to bind to EP4 receptor and reduce Sost  
 361 expression (Galea et al., 2011). Sost, a Wnt signaling antagonist (Semenov et al., 2005), is a key  
 362 regulator of mechanotransduction in bone. Sost, secreted primarily by osteocytes, acts upon  
 363 osteoblasts in a paracrine manner to inhibit bone formation (Poole et al., 2005) through its binding to  
 364 the Wnt co-receptor Lrp5/6 (Li et al., 2005) and suppressing  $\beta$ -catenin (Sawakami et al., 2006). Sost  
 365 gene and protein expression is suppressed by mechanical loading, and is accompanied by increased  
 366 bone formation (Moustafa et al., 2012; Robling et al., 2008). We observed suppressed Sost expression  
 367 in WT and R76W mice by tibial loading; however, the suppressive effect of Sost disappeared in  
 368  $\Delta$ 130-136 mice and the Cx43(M1)-treated mice. Correspondingly, the increased  $\beta$ -catenin expression  
 369 and osteoblast activity observed in WT and R76W mice was abated in  $\Delta$ 130-136 and the Cx43(M1)

370 mice. These results indicate that PGE<sub>2</sub> released by Cx43 hemichannels in osteocytes is a likely factor  
 371 that participates in the bone anabolic response to mechanical stimuli. We previously showed that  
 372 PGE<sub>2</sub> released from osteocytes via Cx43 hemichannels exerts autocrine effects via the EP2/4  
 373 receptor during mechanical stimulation (Xia et al., 2010). This study indicates that the increased  
 374  $\beta$ -catenin in osteoblasts by tibial loading is attenuated in  $\Delta$ 130-136 and the Cx43(M1)-treated mice.  
 375 These results establish a close functional relationship between Cx43 hemichannel-released PGE<sub>2</sub> and  
 376 decreased Sost, and thereby increased  $\beta$ -catenin expression in osteoblasts, ultimately leading to  
 377 enhanced osteoblast activity and endosteal bone formation (**Figure 8H**).

378 There are possible limitations in this study. First, analysis of cortical bone changes at additional  
 379 proximal or distal sites may provide a more comprehensive understanding of the role of Cx43  
 380 hemichannels in anabolic responses to mechanical loading, although a previous study has reported  
 381 that cortical bone located at 25%, 37% and 50% of the tibia's length had similar responses to tibial  
 382 loading (Yang et al., 2017). Second, the monoclonal Cx43(M1) antibody blocks hemichannels not  
 383 only in osteocytes, but also, possibly other cells, such as osteoblasts. However, in our study,  
 384 Cx43(M1) was primarily detected in osteocytes, not in osteoblasts or other bone cells.

385 In summary, this study, for the first time, unveils the crucial role of osteocytic Cx43  
 386 hemichannels in mediating the anabolic function of mechanical loading on endosteal bone surfaces  
 387 and trabecular bone. Cx43 hemichannels activated by mechanical stimulation release PGE<sub>2</sub> from  
 388 osteocytes, which suppresses Sost expression in osteocytes, and enhances osteoblast activity and  
 389 bone formation on endosteal surfaces. These results suggest that osteocytic Cx43 hemichannels  
 390 could be established as a *de novo* new therapeutic target, and activation of these channels may

potentially aid in treating bone loss, in particular, in the elder population with the lost sensitivity to anabolic responses to mechanical stimulation (Lanyon and Skerry, 2001).

## **Materials and Methods**

### **Mouse models**

Two transgenic models expressing dominant-negative mutants of Cx43 in osteocytes, R76W and  $\Delta$ 130-136, were generated as previously described (Xu et al., 2015). The two transgenes were driven by a 10-kb DMP1 promoter and expressed predominantly in osteocytes. The WT and transgenic mice in C57BL/6J background were housed in a temperature-controlled room with a light/dark cycle of 12 hrs at the University of Texas Health Science Center at San Antonio (UTHSCSA) Institutional Lab Animal Research facility under specific pathogen-free conditions. Food and water were freely available. 15-week-old male WT and homozygous transgenic were sedated under isoflurane and euthanized by cervical dislocation. All animal protocols were performed following the National Institutes of Health guidelines for care and use of laboratory animals and approved by the UTHSCSA Institutional Animal Care and Use Committee (IACUC).

### **Tibial mid-diaphyseal strain measurements and cyclic tibial loading**

The relationship between applied compressive loading and bone tissue deformation of the left tibia was established for 15-week-old mice *in vivo* following a previously reported protocol (De Souza et al., 2005; Lynch et al., 2010). Briefly, a strain gauge (EA-06-015DJ-120, Vishay Measurements Group) was attached on the tibial diaphyseal medial mid-shaft of a euthanized mouse and load

applied from 0 to 9.5 N at the ends of the left tibia using a loading machine (LM1, Bose). The strain gauge was connected to a bridge completion module (MR1-350-127, Vishay Measurements Group) and a conditioner/amplifier system. Mechanical load-induced strain was measured, and the compliance relationship between applied load and the resulting strain was determined for each left tibia ( $R^2 > 0.99$ ). Compared to WT mice, a higher compressive force was required to generate comparable periosteal strain in  $\Delta 130$ -136 mice (**Figure 1-figure supplement 1C**).

The cyclic axial compressive load was applied to the left tibia of each mouse using a custom loading device based on previous studies (De Souza et al., 2005; Lynch et al., 2010). Briefly, the left tibia of anesthetized mice was positioned into a custom-made apparatus (**Figure 1-figure supplement 1A**). The upper padded cup containing the knee was connected to the loading device (7528-10, Masterflex L/S, Vernon Hills, IL, USA), and the lower cup held the heel. The left tibia was held in place by a 0.5 N continuous static preload, loaded for 600 cycles (5 min) at 2-Hz frequency, with a sinusoidal waveform (**Figure 1-figure supplement 1B**). Compressive load was performed 5 days/week for 2 weeks to determine bone structural and anabolic response, or 5 consecutive days to assess PGE<sub>2</sub> level. Based on the load-strain relationship, peak force was selected to generate peak periosteal strains of 1200  $\mu\epsilon$  at the cortical midshaft for WT, R76W, and  $\Delta 130$ -136 mice, respectively. This strain level has been previously shown to elicit an anabolic response at this region (Melville et al., 2015). The right tibia was used as a contralateral, non-loaded control.

## M1 antibody generation and treatment

A monoclonal Cx43(M1) antibody targeting the second extracellular loop domains of Cx43 was originally generated by Abmart (Tulsa, OK, USA) and described previously (Zhang et al., 2021). Briefly, mice were immunized with a Cx43 extracellular domain peptide, and after functional characterization of the hybridoma clones, genes that encode the antibody heavy and light chain variable region were cloned from the mouse hybridoma cell line HC1 by reverse transcription quantitative PCR (RT-qPCR), using a combination of a group of cloning PCR primers. The heavy and light chain constructs were co-transfected into human embryonic kidney freestyle 293 (HEK293F) cells, supernatants were harvested, and antibodies were purified by affinity chromatography using protein A resin.

The day before tibial loading, randomly allocated WT mice based on the body weight were intraperitoneally (IP) injected with 25 mg/kg Cx43(M1) or vehicle (phosphate-buffered saline (PBS), pH 7.4). A second dose was administered the day before the start of loading in the 2nd week. The dosage of antibody was based on our data with Cx43(M1) antibody (**Figure S5**) and a previous study using an anti-sclerostin (Sost) antibody (Spatz et al., 2013).

#### ***In vitro* dye uptake and gap junction coupling assays**

The osteocyte-like MLO-Y4 cells were cultured in a-modified essential medium (a-MEM) with 2.5% fetal bovine serum (FBS) and 2.5% calf serum (CS) in a 5% CO<sub>2</sub> incubator at 37°C. MLO-Y4 cells were grown at a low initial cell density on glass slides coated with type I collagen (rat tail collagen type I, Corning, Bedford, MA, USA, 0.15 mg/ml) to ensure that most of the cells were not physically in contact. The cells were preincubated with Cx43(E2) or Cx43(M1) (2 µg/ml) for 30 min and then

subjected to FFSS at 4 dynes/cm<sup>2</sup> for 15 min in the presence of 25 mM ethidium bromide (EtBr) in the recording media (HCO<sub>3</sub><sup>-</sup>-free a-MEM medium buffered with 10 mM HEPES). These cells were then fixed with 1% paraformaldehyde (PFA) for 10 min. The intensity of EtBr fluorescence in cells was measured and quantified by NIH Image J software (NIH, USA). Primary osteocytes were microinjected using an Eppendorf micromanipulator InjectManNI 2 and Femtojet (Eppendorf) at 37°C with 10 mM Oregon green 488 BAPTA-AM (Mr: 1751 Da) as a cell tracker probe, and calcein red-orange AM (Mr: 789 Da) as a probe for detecting gap junction coupling. Images were captured using an inverted microscope equipped with a Lambda DG4 device (Sutter Instrument Co, Novato, CA, USA), a mercury arc lamp illumination, and a Nikon Eclipse microscope (Nikon, Tokyo, Japan) using a rhodamine filter. Loaded cells (dye donor) were “parachuted” over acceptor cells. The cells (acceptors and donors) were pre-incubated for 20 min with Cx43 antibodies before the parachuting assay. Donor cells were then incubated with acceptor cells for 90 min, the time duration sufficient to detect dye transfer.

### ***In vivo* dye uptake assay**

We developed an approach to assess hemichannel activity in osteocytes in the bone *in vivo* (Riquelme et al., 2021). Briefly, 20 mg/ml Evans blue (EB) dye dissolved in sterile saline solution (previously used to study hemichannel activity in muscle cells *in vivo* (Cea et al., 2013)) was injected into the mouse tail vein. For the vehicle or Cx43(M1) treated group, mice were IP injected with mouse IgG or Cx43 (M1) (25 mg/kg) 4 hrs before dye injection. After the dye injection, mice were kept in cages for 20 min, and the left tibias were then loaded for 10 min. Mice were sacrificed and

474 perfused with PBS and 4% PFA 40 min after tibial loading. Tibias were isolated and fixed in 4%  
 475 PFA for 2 days, decalcified in 10% ethylenediaminetetraacetic acid (EDTA) for 3 weeks, and then  
 476 12- $\mu$ m-thick frozen sections were prepared. The cell nuclei were stained with  
 477 4',6-diamidino-2-phenylindole (DAPI). Images were captured using an optical microscope  
 478 (BZ-X710, KEYENCE, Itasca, IL, USA) and EB fluorescence intensity in osteocytes was quantified  
 479 by NIH Image J software (NIH, USA).

480

### 481 **PGE<sub>2</sub> measurement and treatment**

482 The level of PGE<sub>2</sub> in the tibia bone was determined according to the manufacturer's protocol (PGE<sub>2</sub>  
 483 ELISA kit, #514010, Cayman Chemical, Ann Arbor, MI, USA). Briefly, 4 hrs after the final round of  
 484 five-day tibial loading, bone marrow-flushed tibias were isolated free of soft tissues, and bone shafts  
 485 were prepared by removing proximal and distal ends of the bone. Bone tissue was homogenized in  
 486 liquid nitrogen with a frozen mortar and pestle. The concentration of PGE<sub>2</sub> was normalized by total  
 487 protein concentration using a BCA assay (#23225, Thermo Scientific, Rockford, IL, USA).

488 PGE<sub>2</sub> powder (#2296, Tocris Bioscience, Bristol, UK) was dissolved in 10% ethanol and stock  
 489 prepared at the concentration of 0.15 mg/ml. Wild-type mice randomly allocated based on the body  
 490 weight were injected with 1 mg/kg/day of PGE<sub>2</sub> solution or 6.7 $\mu$ l/kg/day 10% ethanol (vehicle) for  
 491 two weeks.

492

### 493 **Micro-computed tomography**



494 Tibias were dissected and frozen in saline-soaked gauze at -20°C until scanning. Samples in PBS  
 495 were imaged using a high-resolution micro-computed tomography ( $\mu$ CT) scanner (1172, SkyScan,  
 496 Brüker microCT, Kontich, Belgium) with the following settings: 59 Kvp, 167  $\mu$ A beam intensity, 0.5  
 497 mm aluminum filter, 800 ms exposure, 1024 x 1024 pixel matrix, and a 10  $\mu$ m isotropic voxel  
 498 dimension. The background noise was removed from the images by eliminating disconnected objects  
 499 smaller than 4 pixels in size. Two bone volumes of interest (VOI) were selected in the metaphyseal  
 500 and midshaft regions. The analyses were conducted excluding the fibula. In the proximal tibial  
 501 metaphysis, the trabecular bone VOI was positioned 0.44 mm distal to the proximal growth plate and  
 502 extended 0.65 mm in the distal direction, excluding the primary spongiosa. Grayscale values of  
 503 80-256 were set as the threshold for trabecular bone. For the cortical region, a 0.3 mm distance was  
 504 centered at 50% tibial length (proximal to distal). Automated contouring was used to select the  
 505 cortex. A threshold of 106-256 was applied to all of the cortical slices for analysis. The structural  
 506 morphometric properties of cortical and trabecular regions were analyzed using the CT Analyser  
 507 software (CTAn 1.18.8.0, Bruker Skyscan).

508

## 509 **Mechanical testing**

510 Three-point bending tests were performed after  $\mu$ CT scanning. The tibia was thawed to room  
 511 temperature before testing. Any remaining muscles and the fibula were carefully removed. The tibia  
 512 was subjected to a three-point bending test along the medial-lateral direction in a micromechanical  
 513 testing system (Mach-1 V500CST, Biomomentum, Laval, Canada). The span distance for the  
 514 three-point bending test was 8 mm, and the loading pin was placed at the midpoint of the span. The

test was performed in a displacement control mode at a constant rate of 0.01 mm/sec, and the data was collected at a 200-Hz sampling rate for all measurements. The accurate cross-sectional areas were determined from  $\mu$ CT and used to calculate mechanical properties (Jepsen et al., 2015).

### **Histomorphometry, immunohistochemistry, and dynamic bone histomorphometry**

Tibias were collected and fixed in 4% PFA for 2 days and decalcified using 10% EDTA (pH 7.5) for 21 days. These tibial samples were embedded in paraffin, and 5-mm-thick sections were collected and mounted onto glass slides. For static bone histomorphometry, tartrate resistant acid phosphatase (TRAP) and toluidine blue staining was used to determine the osteoclast activity (Xu et al., 2015) and osteoblast numbers, respectively. For immunohistochemistry, paraffin sections were rehydrated and antigen site was retrieved with 10 mM citrate buffer (pH 6.0) at 60°C for 2 hrs (for sclerostin or  $\beta$ -catenin) or trypsin buffer (pH 7.8) at 37°C for 30 min (for COX-2), and then probed with an anti-sclerostin (AF1589, 1:400, R&D systems, Minneapolis, MN, USA), anti-COX-2 (12375-1-AP, 1:200, Proteintech, Rosemont, IL, USA) or an anti- $\beta$ -catenin antibody (ab16051, 1:200, Abcam, Waltham, MA, USA) overnight at 4°C. The sections were probed with a biotin-labeled secondary antibody and ABC Reagent (VECTASTAIN, Burlingame, CA, USA). Staining was visualized with DAB Chromogen (SK-4100, Vector Laboratories, Burlingame, CA, USA). Hematoxylin was used as a counterstain. Images were captured using an optical microscope (BZ-X710, KEYENCE). Osteoclast surface (Oc.S), osteoclast number (N.Oc), osteoblast number (N.Ob), and bone surface (BS) on the tibial midshaft cortical bone along the endosteal surface were counted and positive cells quantified using ImageJ software (NIH, USA).

536 Mice were IP injected with calcein (C0875, Sigma-Aldrich, St. Louis, MO, USA) at 20 mg/kg of  
537 body weight 1 day before tibial loading, and followed by alizarin red injection (A5533,  
538 Sigma-Aldrich, St. Louis, MO, USA) at 30 mg/kg of body weight 3 days before euthanization. Tibias  
539 were dissected, fixed in 70% ethanol, and then embedded in methylmethacrylate for 10- $\mu$ m thick  
540 longitudinal plastic sections. Two-color fluorescent images were obtained using a fluorescence  
541 microscope (BZ-X710, KEYENCE). Single label was defined as any bone surface with green, red, or  
542 yellow (no separation between green and red). The distance between green and red fluorescence  
543 signals was measured along the bone surface (Grimston et al., 2012). The following parameters were  
544 quantified at tibial midshaft using NIH ImageJ software (NIH, USA): total perimeter (BS); single  
545 label perimeter (sLS); double label perimeter (dLS), and double-label area (dL.Ar). The following  
546 values were then calculated: mineralizing surface [ $MS/BS = (sLS/2 + dLS)/BS$ ], mineral apposition  
547 rate [ $MAR = dL.Ar/dLS/12$ ], and bone formation rate ( $BFR/BS = MAR \times MS/BS$ ).

548

#### 549 **RNA extraction and RT-qPCR**

550 The long tibial bone was isolated free of soft tissues, and bone marrow was removed by flushing  
551 with RNase-free PBS after two weeks tibial loading. The bone shaft was prepared by removing the  
552 proximal and distal ends of the bone and pulverizing it using a frozen mortar and pestling in liquid  
553 nitrogen. Total RNA was isolated by using TRIzol (Molecular Research Center, Cincinnati, OH,  
554 USA) according to the manufacturer's protocol. cDNA was synthesized by a high-capacity cDNA  
555 reverse transcription kit (#4388950, Applied Biosystems, Carlsbad, CA, USA). mRNA level was  
556 analyzed by real-time RT-qPCR using an ABI 7900 PCR device (Applied Biosystems, Bedford, MA,

USA) and SYBR Green (#1725124, Bio-Rad Laboratories, Hercules, CA, USA) with a two-step protocol (94°C for 10 sec, and 65°C for 30 sec for 40 cycles). The relative gene expression in each loaded tibia was represented by normalizing to GAPDH and then normalized to the control tibia ( $2^{-\Delta\Delta C_t}$ ) (Kenneth J. Livak and Schmittgen, 2001). The primers for *Sost*, *COX-2*, *Runx2*, *Bgalp*,  $\beta$ -catenin, and *Dmp1* are provided in Table S1.

### Statistical analysis

Data collection and analysis were conducted in a blind manner. Statistical analysis was performed using IBM SPSS Statistics 24 (SPSS Inc., Chicago, IL, USA) and graphed with GraphPad Prism 7 (GraphPad Software; La Jolla, CA, USA). For *in vitro* studies, each experiment had three technical replicates and was repeated at least three times. Normal distribution of the data was evaluated by the Shapiro-Wilk test, and homogeneity of variance was assessed by the Levene test. The paired t-test was used for comparisons of the loaded and contralateral tibias within the same group. One-way ANOVA with Tukey test was used for multiple group comparisons. Student unpaired t-test was used to compare between vehicle and Cx43 (M1)-treated groups. All data are presented as means  $\pm$  SD.  $P < 0.05$  was considered significant.

### Acknowledgements

We thank Dr. Eduardo Cardenas and Dr. Francisca Acosta at UTHSCSA for critical reading and editing of the paper.

577 **Funding:** This work was supported by the National Institutes of Health (NIH) Grants: 5RO1  
578 AR072020 (to J.X.J.), and Welch Foundation grant: AQ-1507 (to J.X.J.). We also thank the support  
579 of the UTHSCSA CMMI and the UTHSCSA Optical Imaging Facility supported by the Cancer  
580 Therapy and Research Center through NIH–National Cancer Institute P30 award CA054174 and  
581 Texas State funds.

582 **Conflicts of interest/Competing interests:** The authors declare no conflicts of interest with the  
583 contents of this article.

#### 584 **Authors' contributions**

585 D.Z., G.S. and J.X.J. designed the study; D.Z., M.A.R., T.G., L.W., C.T., H.X., G.S. performed  
586 experiments and analyzed the data; D.Z., and J.X.J. wrote the manuscript, which was reviewed,  
587 commented and approved by all authors.

588

#### 589 **References**

590 **Alford, A. I., Jacobs, C. R. and Donahue, H. J.** (2003). Oscillating fluid flow regulates gap  
591 junction communication in osteocytic MLO-Y4 cells by an ERK1/2 MAP kinase-dependent  
592 mechanism. *Bone* **33**, 64-70.

593 **Bass, S. L., Saxon, L., Daly, R. M., Turner, C. H., Robling, A. G., Seeman, E. and Stuckey,**  
594 **S.** (2002). The effect of mechanical loading on the size and shape of bone in pre-, peri-, and  
595 postpubertal girls: a study in tennis players. *J Bone Miner Res* **17**, 2274-80.

596 **Batra, N., Burra, S., Siller-Jackson, A. J., Gu, S., Xia, X., Weber, G. F., DeSimone, D.,**  
597 **Bonewald, L. F., Lafer, E. M., Sprague, E. et al. (2012).** Mechanical stress-activated integrin  
598 alpha5beta1 induces opening of connexin 43 hemichannels. *Proc Natl Acad Sci U S A* **109**, 3359-64.

599 **Batra, N., Riquelme, M. A., Burra, S., Kar, R., Gu, S. and Jiang, J. X. (2014).** Direct  
600 regulation of osteocytic connexin 43 hemichannels through AKT kinase activated by mechanical  
601 stimulation. *J Biol Chem* **289**, 10582-10591.

602 **Birkhold, A. I., Razi, H., Duda, G. N., Checa, S. and Willie, B. M. (2017).**  
603 Tomography-Based Quantification of Regional Differences in Cortical Bone Surface Remodeling  
604 and Mechano-Response. *Calcif Tissue Int* **100**, 255-270.

605 **Bivi, N., Pacheco-Costa, R., Brun, L. R., Murphy, T. R., Farlow, N. R., Robling, A. G.,**  
606 **Bellido, T. and Plotkin, L. I. (2013).** Absence of Cx43 selectively from osteocytes enhances  
607 responsiveness to mechanical force in mice. *J Orthop Res* **31**, 1075-81.

608 **Bonewald, L. F. (2011).** The amazing osteocyte. *J Bone Miner Res* **26**, 229-38.

609 **Bonewald, L. F. and Johnson, M. L. (2008).** Osteocytes, Mechanosensing and Wnt Signaling.  
610 *Bone* **42**, 606-615.

611 **Cea, L. A., Cisterna, B. A., Puebla, C., Frank, M., Figueroa, X. F., Cardozo, C., Willecke,**  
612 **K., Latorre, R. and Saez, J. C. (2013).** De novo expression of connexin hemichannels in  
613 denervated fast skeletal muscles leads to atrophy. *Proc Natl Acad Sci U S A* **110**, 16229-34.

614 **Cheng, B., Zhao, S., Luo, J., Sprague, E., Bonewald, L. F. and Jiang, J. X.** (2001).  
615 Expression of functional gap junctions and regulation by fluid flow in osteocyte-like MLO-Y4 cells.  
616 *J Bone Miner Res* **16**, 249-59.

617 **Cherian, P. P., Siller-Jackson, A. J., Gu, S., Wang, X., Bonewald, L. F., Sprague, E. and**  
618 **Jiang, J. X.** (2005). Mechanical strain opens connexin 43 hemichannels in osteocytes: a novel  
619 mechanism for the release of prostaglandin. *Mol Biol Cell* **16**, 3100-6.

620 **Civitelli, R.** (2008). Cell-cell communication in the osteoblast/osteocyte lineage. *Arch Biochem*  
621 *Biophys* **473**, 188-92.

622 **Cusato, K., Ripps, H., Zakevicius, J. and Spray, D. C.** (2006). Gap junctions remain open  
623 during cytochrome c-induced cell death: relationship of conductance to 'bystander' cell killing. *Cell*  
624 *Death Differ* **13**, 1707-14.

625 **Dahl, A. C. E. and Thompson, M. S.** (2011). 5.18 - Mechanobiology of Bone. In  
626 *Comprehensive Biotechnology (Second Edition)*, (ed. M. Moo-Young), pp. 217-236. Burlington:  
627 Academic Press.

628 **De Souza, R. L., Matsuura, M., Eckstein, F., Rawlinson, S. C., Lanyon, L. E. and**  
629 **Pitsillides, A. A.** (2005). Non-invasive axial loading of mouse tibiae increases cortical bone  
630 formation and modifies trabecular organization: a new model to study cortical and cancellous  
631 compartments in a single loaded element. *Bone* **37**, 810-8.

632 **Erlandson, M. C., Kontulainen, S. A., Chilibeck, P. D., Arnold, C. M., Faulkner, R. A. and**  
633 **Baxter-Jones, A. D.** (2012). Higher premenarcheal bone mass in elite gymnasts is maintained into

634 young adulthood after long-term retirement from sport: a 14-year follow-up. *J Bone Miner Res* **27**,  
635 104-10.

636 **Forwood, M. R.** (1996). Inducible cyclo-oxygenase (COX-2) mediates the induction of bone  
637 formation by mechanical loading in vivo. *J Bone Miner Res* **11**, 1688-93.

638 **Galea, G. L., Sunters, A., Meakin, L. B., Zaman, G., Sugiyama, T., Lanyon, L. E. and**  
639 **Price, J. S.** (2011). Sost down-regulation by mechanical strain in human osteoblastic cells involves  
640 PGE2 signaling via EP4. *FEBS Lett* **585**, 2450-4.

641 **Genetos, D. C., Kephart, C. J., Zhang, Y., Yellowley, C. E. and Donahue, H. J.** (2007).  
642 Oscillating fluid flow activation of gap junction hemichannels induces ATP release from MLO-Y4  
643 osteocytes. *J Cell Physiol* **212**, 207-14.

644 **Grimston, S. K., Brodt, M. D., Silva, M. J. and Civitelli, R.** (2008). Attenuated response to in  
645 vivo mechanical loading in mice with conditional osteoblast ablation of the connexin43 gene (Gja1).  
646 *J Bone Miner Res* **23**, 879-86.

647 **Grimston, S. K., Screen, J., Haskell, J. H., Chung, D. J., Brodt, M. D., Silva, M. J. and**  
648 **Civitelli, R.** (2006). Role of connexin43 in osteoblast response to physical load. *Ann N Y Acad Sci*  
649 **1068**, 214-24.

650 **Grimston, S. K., Watkins, M. P., Brodt, M. D., Silva, M. J. and Civitelli, R.** (2012).  
651 Enhanced periosteal and endocortical responses to axial tibial compression loading in conditional  
652 connexin43 deficient mice. *PLOS ONE* **7**, e44222.



- 653 **Ishihara, Y., Kamioka, H., Honjo, T., Ueda, H., Takano-Yamamoto, T. and Yamashiro, T.**  
654 (2008). Hormonal, pH, and calcium regulation of connexin 43-mediated dye transfer in osteocytes in  
655 chick calvaria. *J Bone Miner Res* **23**, 350-60.
- 656 **Jee, W. S., Ueno, K., Deng, Y. P. and Woodbury, D. M.** (1985). The effects of prostaglandin  
657 E2 in growing rats: increased metaphyseal hard tissue and cortico-endosteal bone formation. *Calcif*  
658 *Tissue Int* **37**, 148-57.
- 659 **Jepsen, K. J., Silva, M. J., Vashishth, D., Guo, X. E. and van der Meulen, M. C.** (2015).  
660 Establishing biomechanical mechanisms in mouse models: practical guidelines for systematically  
661 evaluating phenotypic changes in the diaphyses of long bones. *J Bone Miner Res* **30**, 951-66.
- 662 **Jiang, J. X. and Cherian, P. P.** (2003 ). Hemichannels formed by connexin 43 play an  
663 important role in the release of prostaglandin E2 by osteocytes in response to mechanical strain. *Cell*  
664 *Commun Adhes* **10**, 259-264.
- 665 **Kenneth J. Livak and Schmittgen, T. D.** (2001). Analysis of relative gene expression data  
666 using real time quantitative PCR and the 2 DDCT method. *Methods* **25**, 402-408.
- 667 **Kitase, Y., Barragan, L., Qing, H., Kondoh, S., Jiang, J. X., Johnson, M. L. and Bonewald,**  
668 **L. F.** (2010). Mechanical induction of PGE<sub>2</sub> in osteocytes blocks glucocorticoid induced apoptosis  
669 through both the  $\beta$ -catenin and PKA pathways. *J Bone Miner Res* **25**, 2657-2668.
- 670 **Lang, T., LeBlanc, A., Evans, H., Lu, Y., Genant, H. and Yu, A.** (2004). Cortical and  
671 trabecular bone mineral loss from the spine and hip in long-duration spaceflight. *J Bone Miner Res*  
672 **19**, 1006-12.

673 **Lanyon, L. and Skerry, T.** (2001). Postmenopausal osteoporosis as a failure of bone's  
674 adaptation to functional loading: a hypothesis. *J Bone Miner Res* **16**, 1937-47.

675 **Li, X., Zhang, Y., Kang, H., Liu, W., Liu, P., Zhang, J., Harris, S. E. and Wu, D.** (2005).  
676 Sclerostin binds to LRP5/6 and antagonizes canonical Wnt signaling. *J Biol Chem* **280**, 19883-7.

677 **Loiselle, A. E., Jiang, J. X. and Donahue, H. J.** (2012). Gap junction and hemichannel  
678 functions in osteocytes. *Bone* **54**, 205-212.

679 **Lynch, M. E., Main, R. P., Xu, Q., Walsh, D. J., Schaffler, M. B., Wright, T. M. and van**  
680 **der Meulen, M. C.** (2010). Cancellous bone adaptation to tibial compression is not sex dependent in  
681 growing mice. *J Appl Physiol (1985)* **109**, 685-91.

682 **Melville, K. M., Kelly, N. H., Surita, G., Buchalter, D. B., Schimenti, J. C., Main, R. P.,**  
683 **Ross, F. P. and van der Meulen, M. C.** (2015). Effects of Deletion of ERalpha in  
684 Osteoblast-Lineage Cells on Bone Mass and Adaptation to Mechanical Loading Differ in Female and  
685 Male Mice. *J Bone Miner Res* **30**, 1468-80.

686 **Moustafa, A., Sugiyama, T., Prasad, J., Zaman, G., Gross, T. S., Lanyon, L. E. and Price,**  
687 **J. S.** (2012). Mechanical loading-related changes in osteocyte sclerostin expression in mice are more  
688 closely associated with the subsequent osteogenic response than the peak strains engendered.  
689 *Osteoporos Int* **23**, 1225-34.

690 **Poole, K. E. S., Bezooijen, R. L. v., Loveridge, N., Hamersma, H., Papapoulos, S. E., Wik,**  
691 **C. W. L. and Reeve, J.** (2005). Sclerostin is a delayed secreted product of osteocytes that inhibits  
692 bone formation. *FABSE J* **19**, 1842-1844.

693 **Riquelme, M. A., Burra, S., Kar, R., Lampe, P. D. and Jiang, J. X. (2015).**  
694 Mitogen-activated Protein Kinase (MAPK) Activated by Prostaglandin E2 Phosphorylates Connexin  
695 43 and Closes Osteocytic Hemichannels in Response to Continuous Flow Shear Stress. *J Biol Chem*  
696 **290**, 28321-28328.

697 **Riquelme, M. A., Gu, S., Hua, R. and Jiang, J. X. (2021).** Mechanotransduction via the  
698 coordinated actions of integrins, PI3K signaling and Connexin hemichannels. *Bone Res* **9**, 8.

699 **Robling, A. G., Niziolek, P. J., Baldridge, L. A., Condon, K. W., Allen, M. R., Alam, I.,**  
700 **Mantila, S. M., Gluhak-Heinrich, J., Bellido, T. M., Harris, S. E. et al. (2008).** Mechanical  
701 stimulation of bone in vivo reduces osteocyte expression of Sost/sclerostin. *J Biol Chem* **283**,  
702 5866-75.

703 **Sawakami, K., Robling, A. G., Ai, M., Pitner, N. D., Liu, D., Warden, S. J., Li, J., Maye, P.,**  
704 **Rowe, D. W., Duncan, R. L. et al. (2006).** The Wnt co-receptor LRP5 is essential for skeletal  
705 mechanotransduction but not for the anabolic bone response to parathyroid hormone treatment. *J*  
706 *Biol Chem* **281**, 23698-711.

707 **Semenov, M., Tamai, K. and He, X. (2005).** SOST is a ligand for LRP5/LRP6 and a Wnt  
708 signaling inhibitor. *J Biol Chem* **280**, 26770-5.

709 **Sharir, A., Barak, M. M. and Shahar, R. (2008).** Whole bone mechanics and mechanical  
710 testing. *Vet J* **177**, 8-17.

711 **Siller-Jackson, A. J., Burra, S., Gu, S., Xia, X., Bonewald, L. F., Sprague, E. and Jiang, J.**  
712 **X. (2008).** Adaptation of connexin 43-hemichannel prostaglandin release to mechanical loading. *J*  
713 *Biol Chem* **283**, 26374-82.

714 **Spatz, J. M., Ellman, R., Cloutier, A. M., Louis, L., van Vliet, M., Suva, L. J., Dwyer, D.,**  
715 **Stolina, M., Ke, H. Z. and Bouxsein, M. L. (2013).** Sclerostin antibody inhibits skeletal  
716 deterioration due to reduced mechanical loading. *J Bone Miner Res* **28**, 865-74.

717 **Thorsen, K., Kristoffersson, A. O., Lerner, U. H. and Lorentzon, R. P. (1996).** In situ  
718 microdialysis in bone tissue. Stimulation of prostaglandin E2 release by weight-bearing mechanical  
719 loading. *J Clin Invest* **98**, 2446-9.

720 **Tian, X. Y., Zhang, Q., Zhao, R., Setterberg, R. B., Zeng, Q. Q., Ma, Y. F. and Jee, W. S.**  
721 **(2007).** Continuous infusion of PGE2 is catabolic with a negative bone balance on both cancellous  
722 and cortical bone in rats. *J Musculoskelet Neuronal Interact* **7**, 372-81.

723 **Warden, S. J., Fuchs, R. K., Castillo, A. B., Nelson, I. R. and Turner, C. H. (2007).** Exercise  
724 when young provides lifelong benefits to bone structure and strength. *J Bone Miner Res* **22**, 251-9.

725 **Xia, X., Batra, N., Shi, Q., Bonewald, L. F., Sprague, E. and Jiang, J. X. (2010).**  
726 Prostaglandin promotion of osteocyte gap junction function through transcrip- tional regulation of  
727 connexin 43 by glycogen synthase kinase 3/ $\beta$ catenin signaling. *Molecular and Cellular Biology* **30**,  
728 206-219.

729        **Xu, H., Gu, S., Riquelme, M. A., Burra, S., Callaway, D., Cheng, H., Guda, T., Schmitz, J.,**  
730        **Fajardo, R. J., Werner, S. L. et al. (2015).** Connexin 43 channels are essential for normal bone  
731        structure and osteocyte viability. *J Bone Miner Res* **30**, 436-48.

732        **Yang, H., Embry, R. E. and Main, R. P. (2017).** Effects of Loading Duration and Short Rest  
733        Insertion on Cancellous and Cortical Bone Adaptation in the Mouse Tibia. *PLOS ONE* **12**,  
734        e0169519.

735        **Zhang, C., Yan, Z., Maknojia, A., Riquelme, M. A., Gu, S., Booher, G., Wallace, D. J.,**  
736        **Bartanusz, V., Goswami, A., Xiong, W. et al. (2021).** Inhibition of astrocyte hemichannel improves  
737        recovery from spinal cord injury. *JCI Insight* **6**.

738        **Zhang, Y., Paul, E. M., Sathyendra, V., Davison, A., Sharkey, N., Bronson, S., Srinivasan,**  
739        **S., Gross, T. S. and Donahue, H. J. (2011).** Enhanced osteoclastic resorption and responsiveness to  
740        mechanical load in gap junction deficient bone. *PLOS ONE* **6**, e23516.

741

# Figure 1

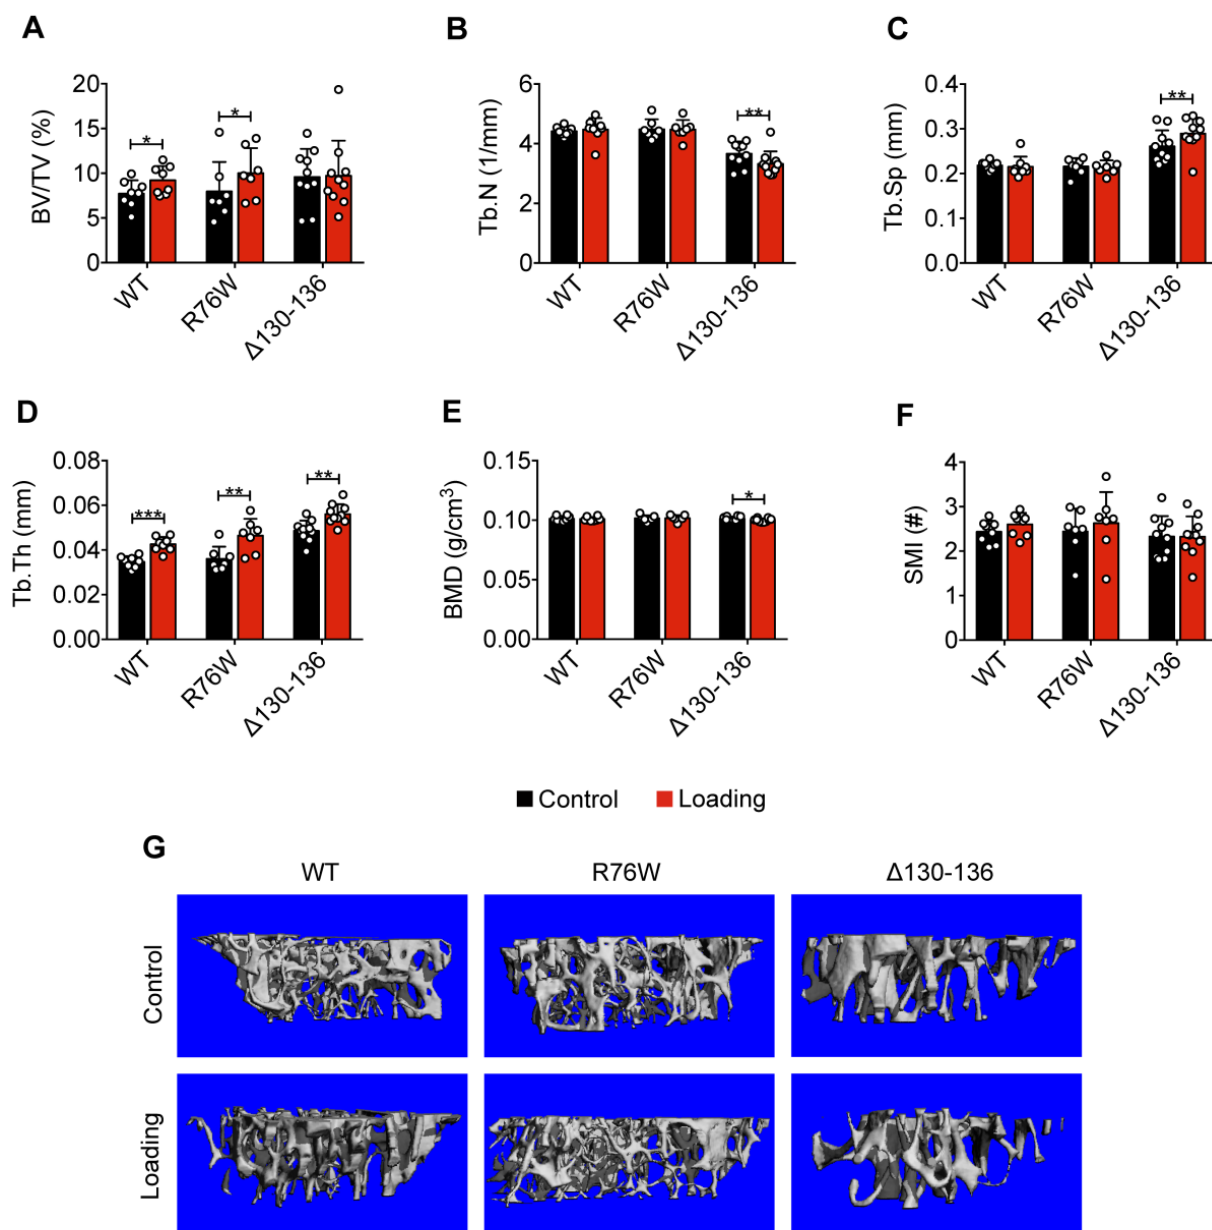

**Figure 1. Attenuation or reversal of anabolic responses to mechanical loading in tibial metaphyseal trabecular bone of  $\Delta 130-136$  mice.**

$\mu$ CT was used to assess metaphyseal trabecular bone of WT, R76W, and  $\Delta 130-136$  mice; (A) bone volume fraction, (B) trabecular number, (C) trabecular separation, (D) trabecular thickness, (E) bone mineral density, and (F) structure model index. n=7-10/group. (G) Representative 3D models of the metaphyseal trabecular bone for all groups. Data are expressed as mean  $\pm$  SD. \*, P<0.05; \*\*, P<0.01; \*\*\*, P<0.001. Statistical analysis was performed using paired t-test for loaded and contralateral, unloaded tibias.

## Figure 2

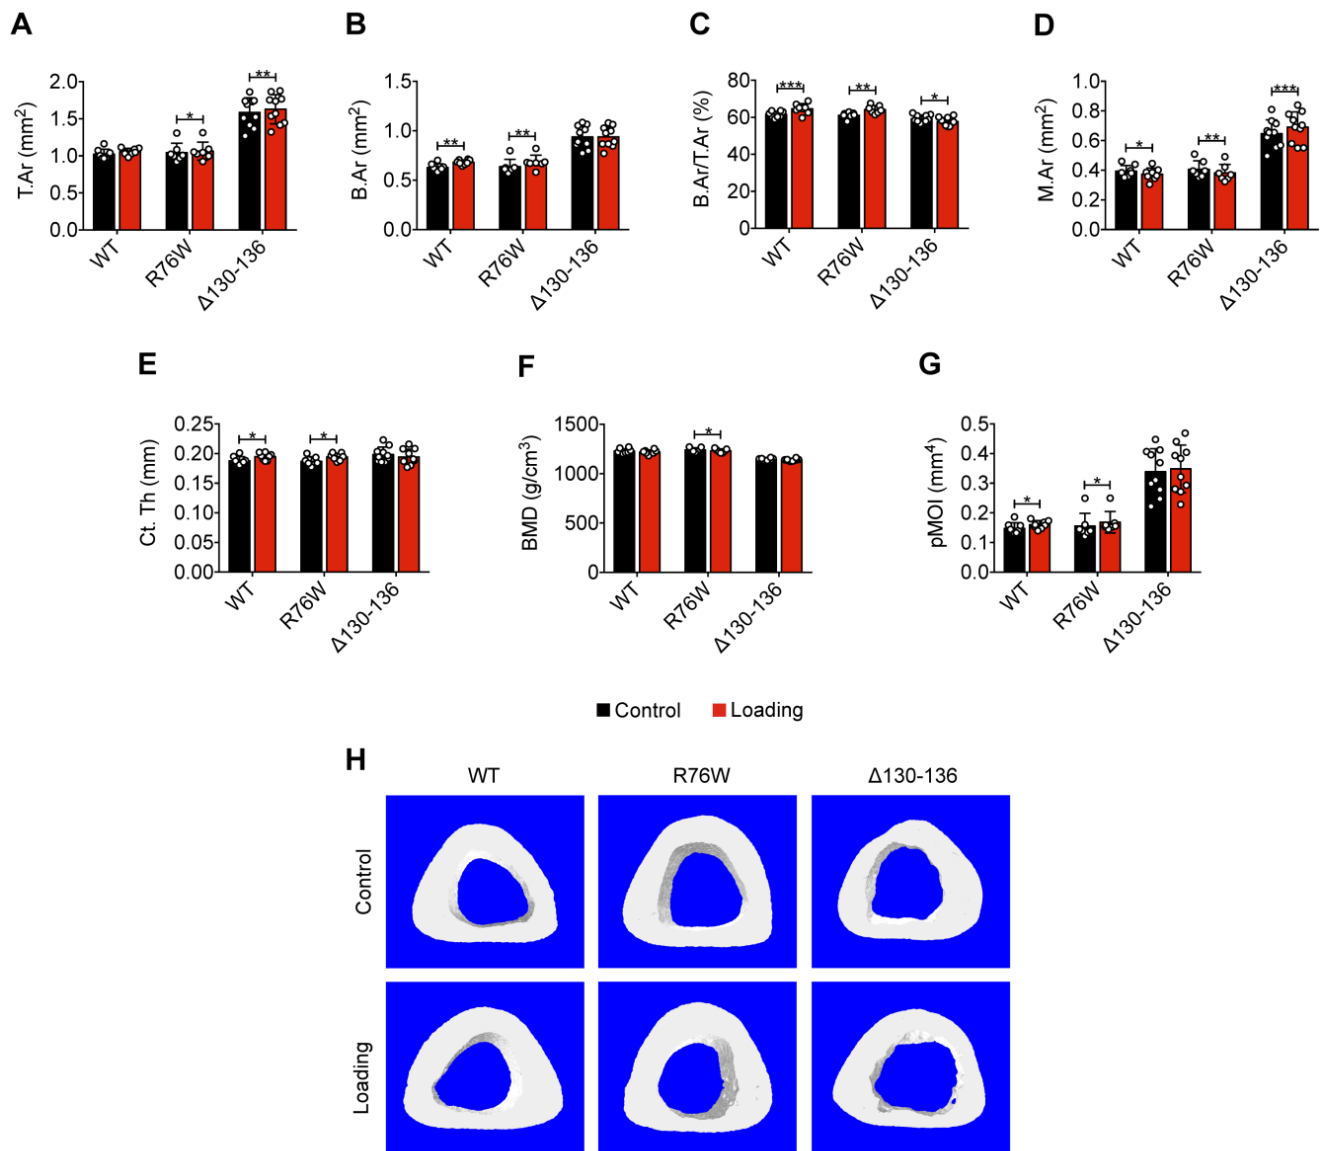

**Figure 2. Attenuation or reversal of anabolic responses to mechanical loading in midshaft cortical bone of  $\Delta 130-136$  mice.**

$\mu$ CT was used to assess tibial midshaft cortical bone (50% site) of WT, R76W, and  $\Delta 130-136$  mice; (A) total area, (B) bone area, (C) bone area fraction, (D) bone marrow area, (E) cortical thickness, (F) bone mineral density, and (G) polar moment of inertia. n=7-10/group. (H) Representative 3D models of the tibial midshaft cortical bone for all groups. Data are expressed as mean  $\pm$  SD. \*, P<0.05; \*\*, P<0.01; \*\*\*, P<0.001. Statistical analysis was performed using paired t-test for loaded and contralateral, unloaded tibias.

766 **Figure 3**

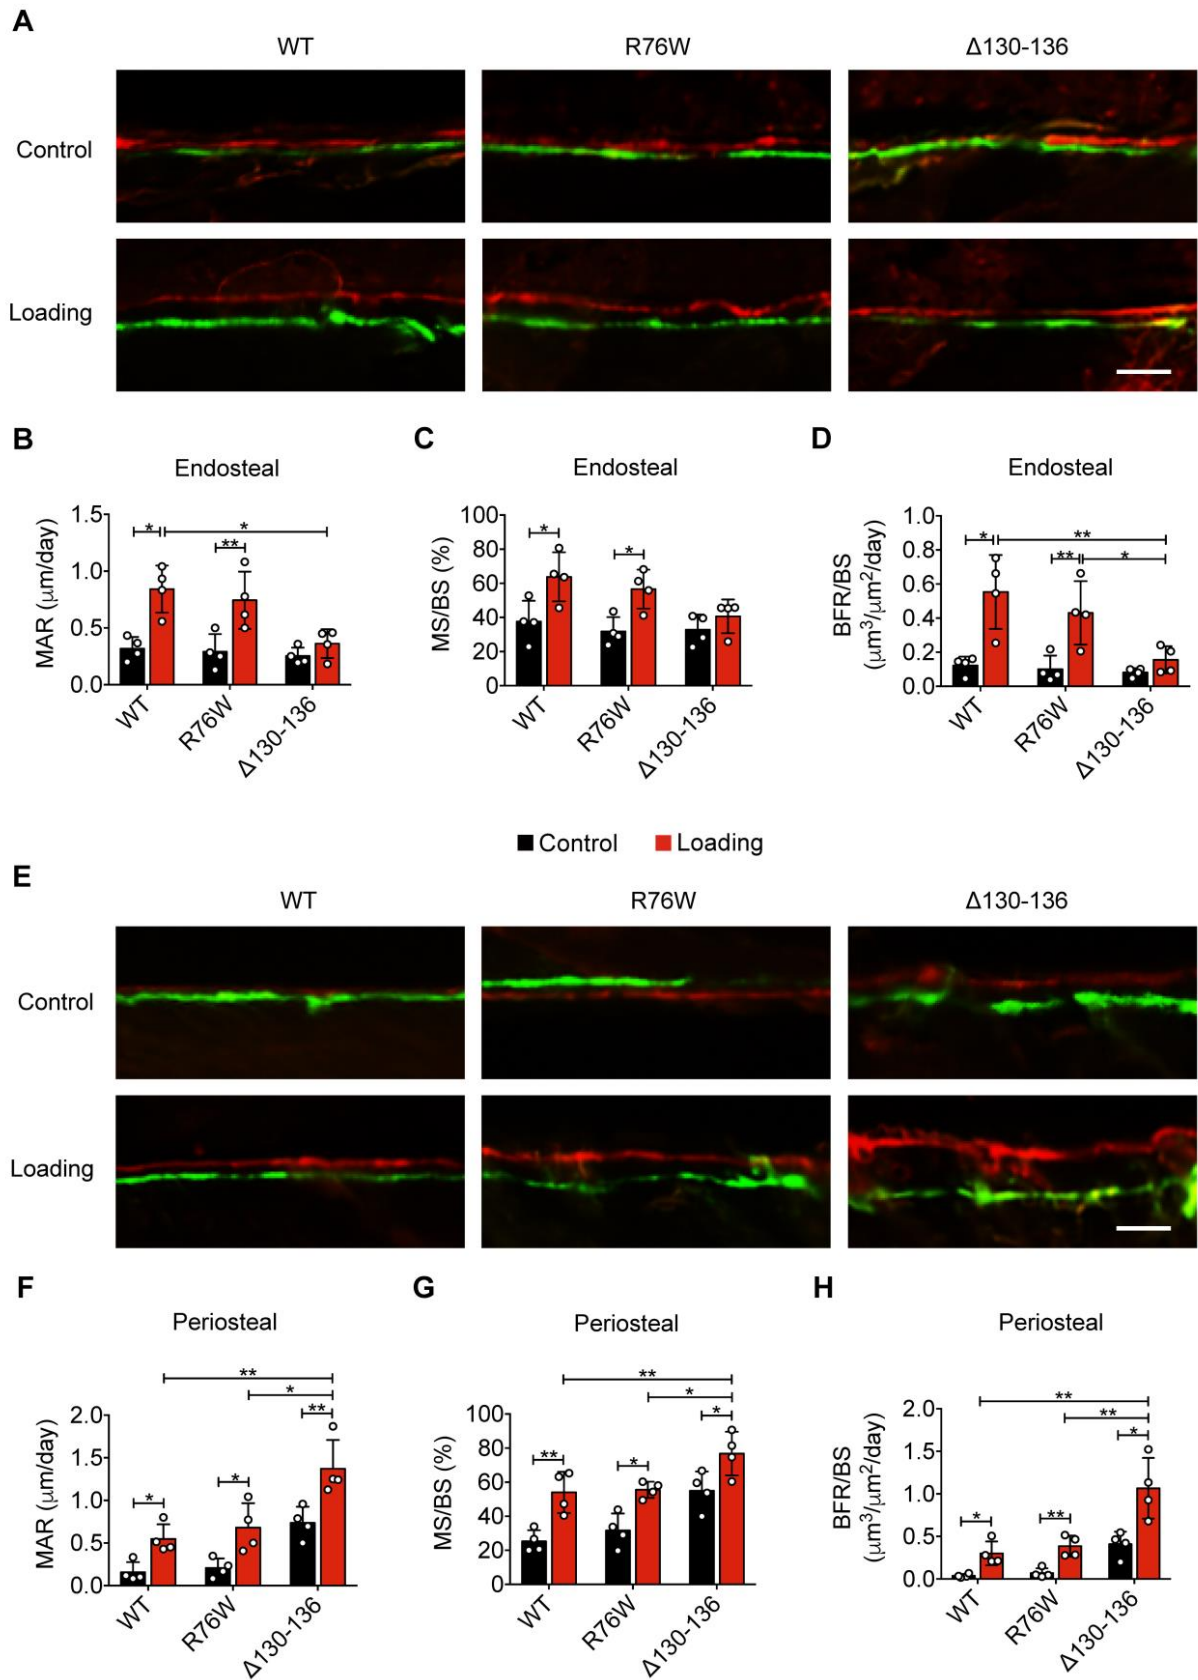

767



### **Figure 3. Reduced midshaft endosteal osteogenic responses to mechanical loading in $\Delta$ 130-136 mice.**

Dynamic histomorphometric analyses were performed on the tibial midshaft cortical endosteal and periosteal surfaces after 2 weeks of tibial loading of WT, R76W, and  $\Delta$ 130-136 mice. Representative images of calcein (green) alizarin (red) double labeling on (A) endosteal and (E) periosteal surface. Scale bar: 50  $\mu$ m. Mineral apposition rate (MAR) (B and F), mineralizing surface/bone surface (MS/BS) (C and G), and bone formation rate (BFR/BS) (D and H) were assessed for endosteal (B-D) and periosteal (F-H) surfaces n=4/group. Data are expressed as mean  $\pm$  SD. \*, P<0.05; \*\*, P<0.01. Statistical analysis was performed using paired t-test for loaded and contralateral, unloaded tibias or one-way ANOVA with Tukey test for loaded tibias among different genotypes.

778 **Figure 4**

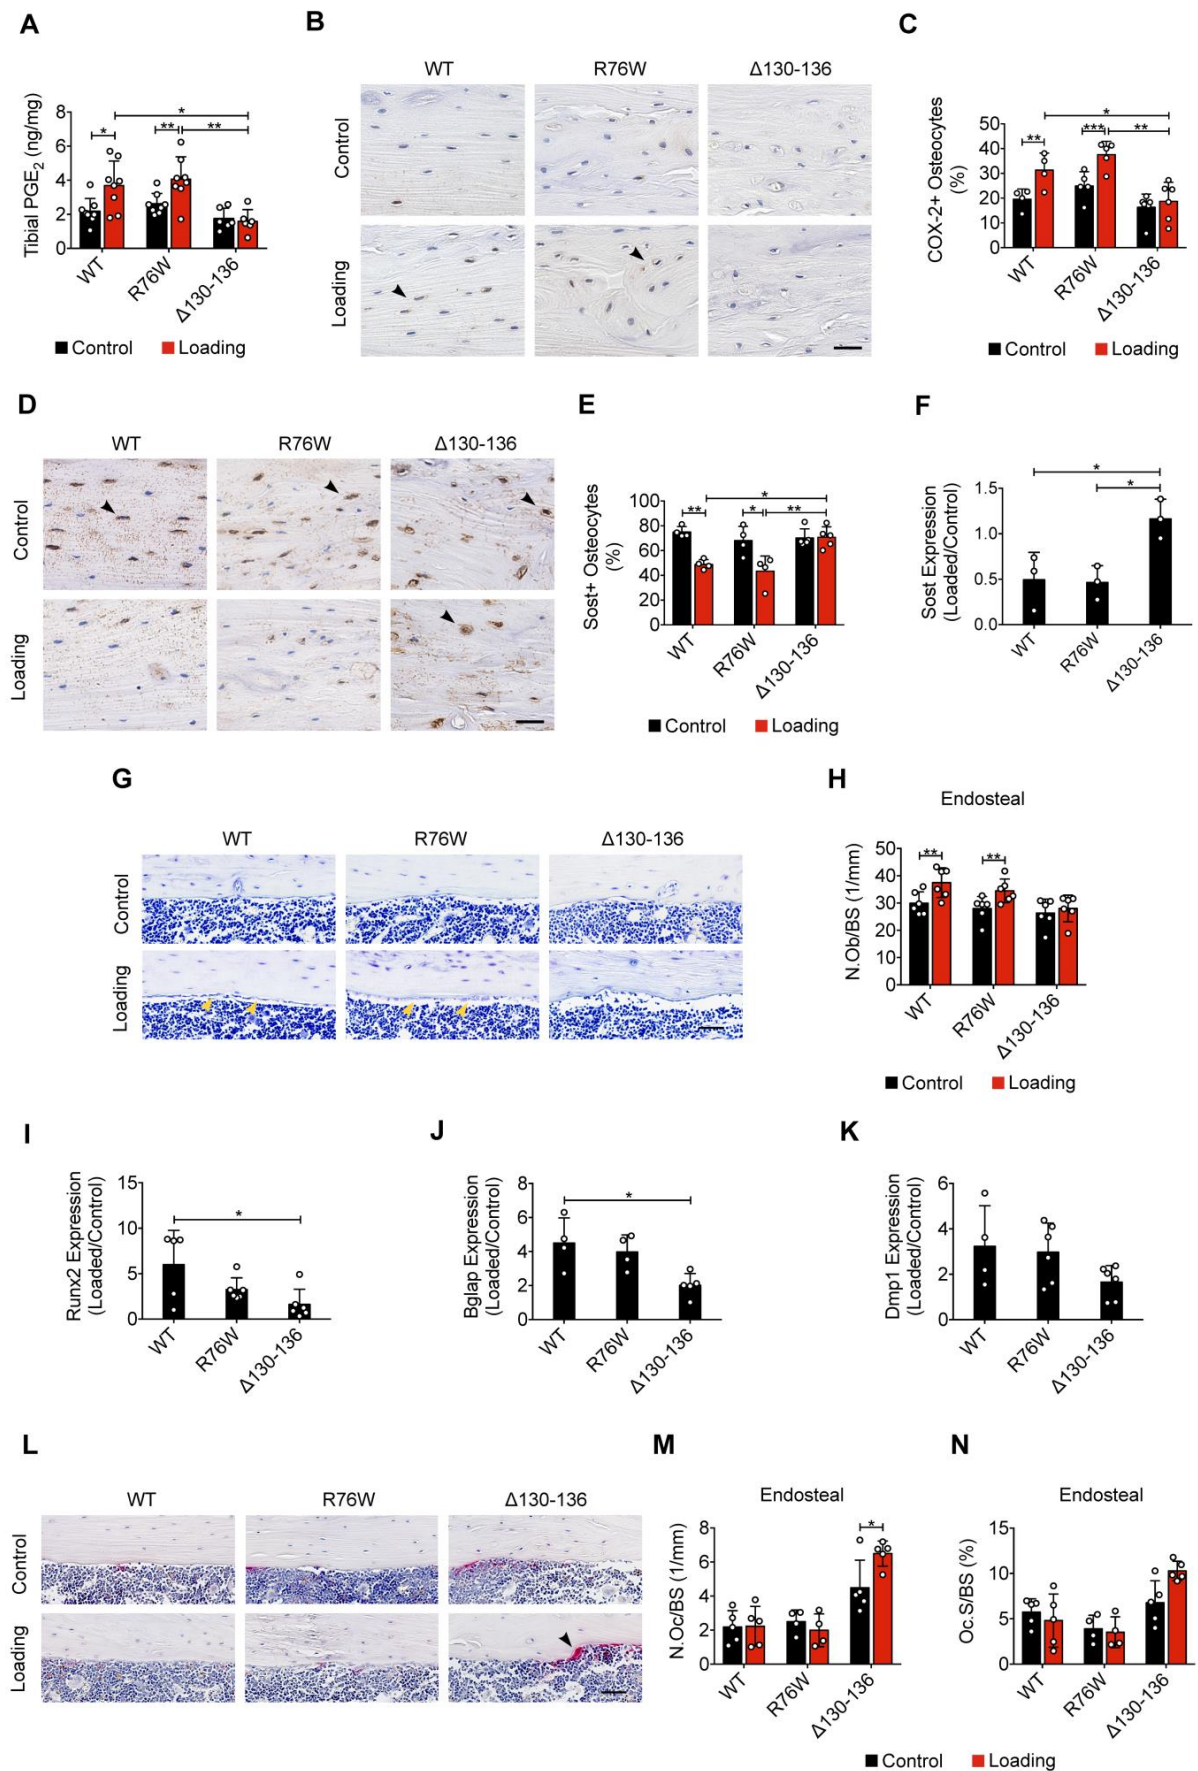

779

**Figure 4. Inhibition of the loading-induced PGE<sub>2</sub> secretion and osteoblast activity, and promotion of osteoclast activity in  $\Delta$ 130-136 mice.**

(A) ELISA analysis of PGE<sub>2</sub> in bone marrow-flushed tibial diaphysis after 5 days of tibial loading, in WT, R76W, and  $\Delta$ 130-136 mice. n=6-8/group. (B and C) Representative images and quantitative analysis of COX-2-positive osteocytes (black arrows) in the tibial midshaft cortical bone after 2 weeks of loading in WT, R76W, and  $\Delta$ 130-136 mice. Scale bar: 30  $\mu$ m. n=4-6/group. (D and E) Representative images and quantitative analysis of the Sost-positive osteocytes (black arrows) in tibial midshaft cortical bone after 2 weeks of tibial loading in WT, R76W, and  $\Delta$ 130-136 mice. Scale bar: 30  $\mu$ m. n=4-5/group. (F) Gene expression of Sost in bone marrow-flushed tibial diaphysis of WT, R76W, and  $\Delta$ 130-136 mice. n=3/group. (G and H) Toluidine blue staining was used to determine the number of endosteal osteoblasts (yellow arrows) on tibial midshaft cortical bone in WT, R76W, and  $\Delta$ 130-136 mice after 2 weeks of loading. Scale bar: 30  $\mu$ m; n=6/group. mRNA expression of osteoblast markers, Runx2 (I) and Bglap (J), and osteocyte marker, Dmp1 (K) in bone marrow-flushed tibial diaphysis of WT, R76W, and  $\Delta$ 130-136 mice. n=4-6/group. (L) Representative images of tibial midshaft endosteal surface stained for TRAP (black arrows). Scale bar: 30  $\mu$ m. (M and N) Histomorphometric quantitation of osteoclasts per bone perimeter (M) and osteoclast surface per bone perimeter (N) (n=4-5/group). All quantitative data are expressed as mean  $\pm$  SD. \*, P<0.05; \*\*, P<0.01; \*\*\*, P<0.001. Statistical analysis was performed using paired t-test for loaded and contralateral tibias or one-way ANOVA with Tukey test for loaded tibias among different genotypes.

# Figure 5

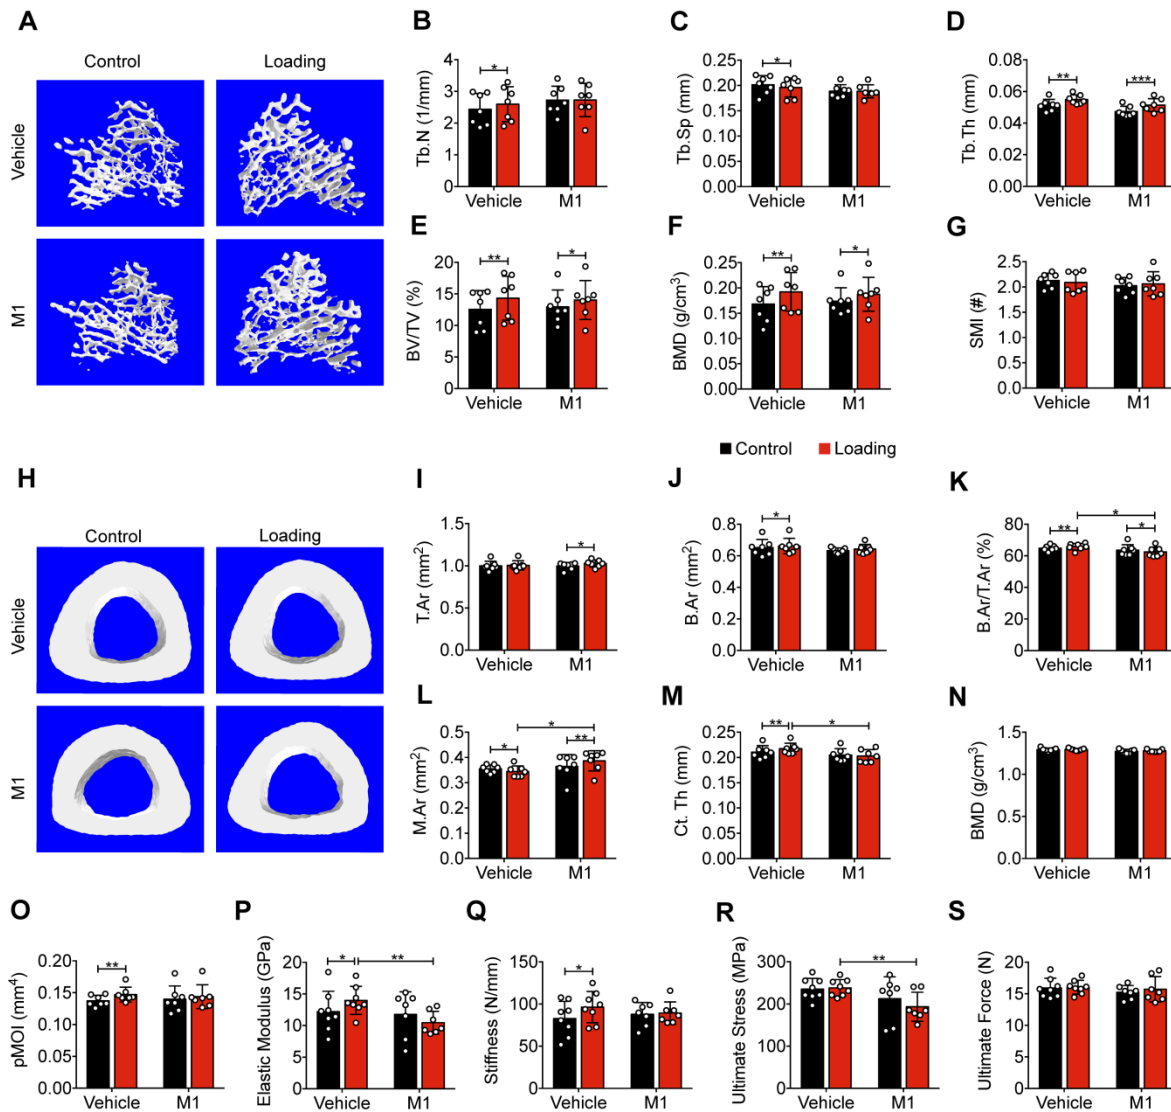

**Figure 5. Inhibition of Cx43 hemichannels by Cx43(M1) antibody impairs anabolic effects of mechanical loading on trabecular and cortical bones.**

(A) Representative 3D models of the metaphyseal trabecular bone of vehicle and Cx43(M1)-treated mice. (B-G)  $\mu$ CT was used to assess structural parameters of trabecular bone; (B) trabecular number, (C) trabecular separation, (D) trabecular thickness, (E) bone volume fraction, (F) bone mineral density, and (G) structure model index in vehicle and Cx43 (M1)-treated mice.  $n=7$ /group. (H) Representative 3D models of the tibial midshaft cortical bone (50% site) in vehicle and Cx43(M1)-treated mice. (I-N)  $\mu$ CT was used to assess structural parameters of cortical bone; (I) total area, (J) bone area, (K) bone area fraction, (L) bone marrow area, (M) cortical thickness, (N) bone mineral density and (O) polar moment of inertia in vehicle and Cx43(M1)-treated mice.  $n=7$ /group. (P-S) The three-point bending assay was performed for tibial bone of vehicle and Cx43 (M1)-treated mice; (P) elastic modulus, (Q) stiffness, (R) ultimate stress, and (S) ultimate force.  $n=7-8$ /group. Data are expressed as mean  $\pm$  SD. \*,  $P<0.05$ ; \*\*,  $P<0.01$ ; \*\*\*,  $P<0.001$ . Statistical analysis was performed using paired t-test for loaded and contralateral or unpaired t-test for loaded tibias between vehicle- and Cx43(M1)-treated groups.

# Figure 6

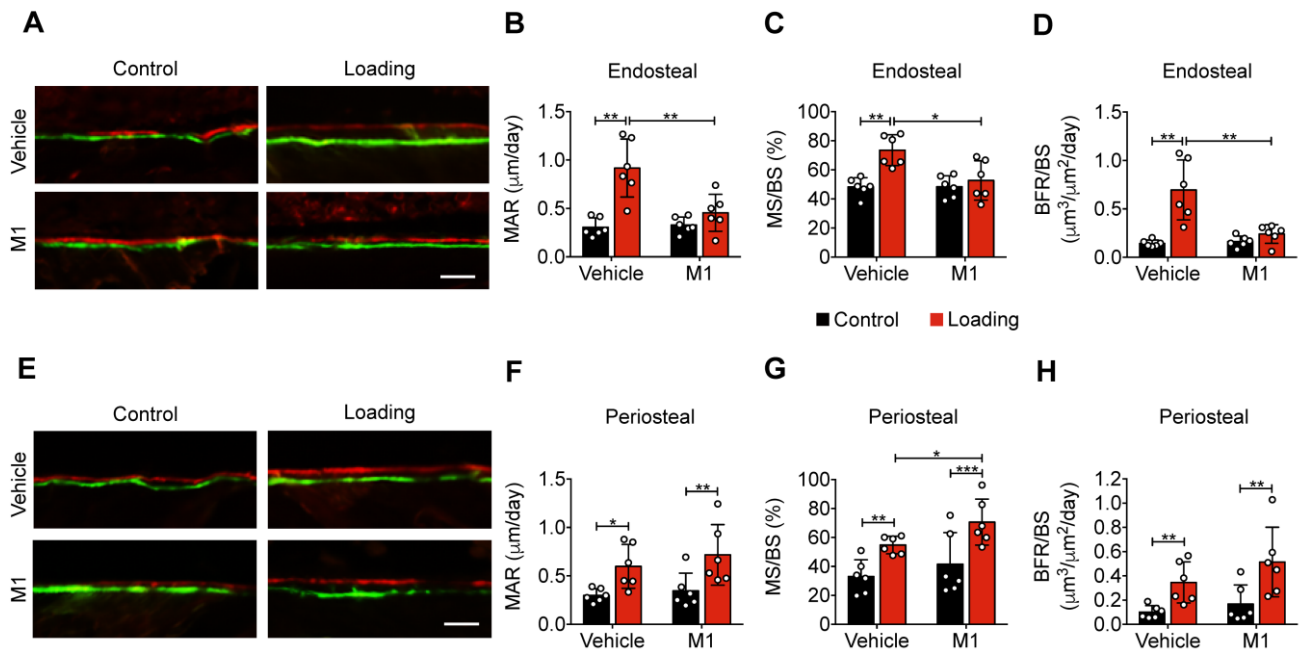

**Figure 6. Cx43(M1) inhibits the load-induced increase in midshaft endosteal osteogenesis.** Dynamic histomorphometric analyses were performed on the tibial midshaft cortical endosteal (A-D) and periosteal (E-H) surfaces after 2 weeks of loading in vehicle and Cx43(M1)-treated mice. (A and E) Representative images of calcein (green) alizarin (red) double labeling on (a) endosteal and (E) periosteal surface Scale bar: 50  $\mu\text{m}$ . Mineral apposition rate (MAR), mineralizing surface/bone surface (MS/BS), and bone formation rate (BFR/BS) were assessed for (B-D) endosteal and (F-H) periosteal surfaces (n=6/group). Data are expressed as mean  $\pm$  SD. \*, P<0.05; \*\*, P<0.01; \*\*\*, P<0.001. Statistical analysis was performed using paired t-test for loaded and contralateral, unloaded tibias or unpaired t-test for loaded tibias between vehicle and Cx43(M1)-treated groups.



# 832 **Figure 7**

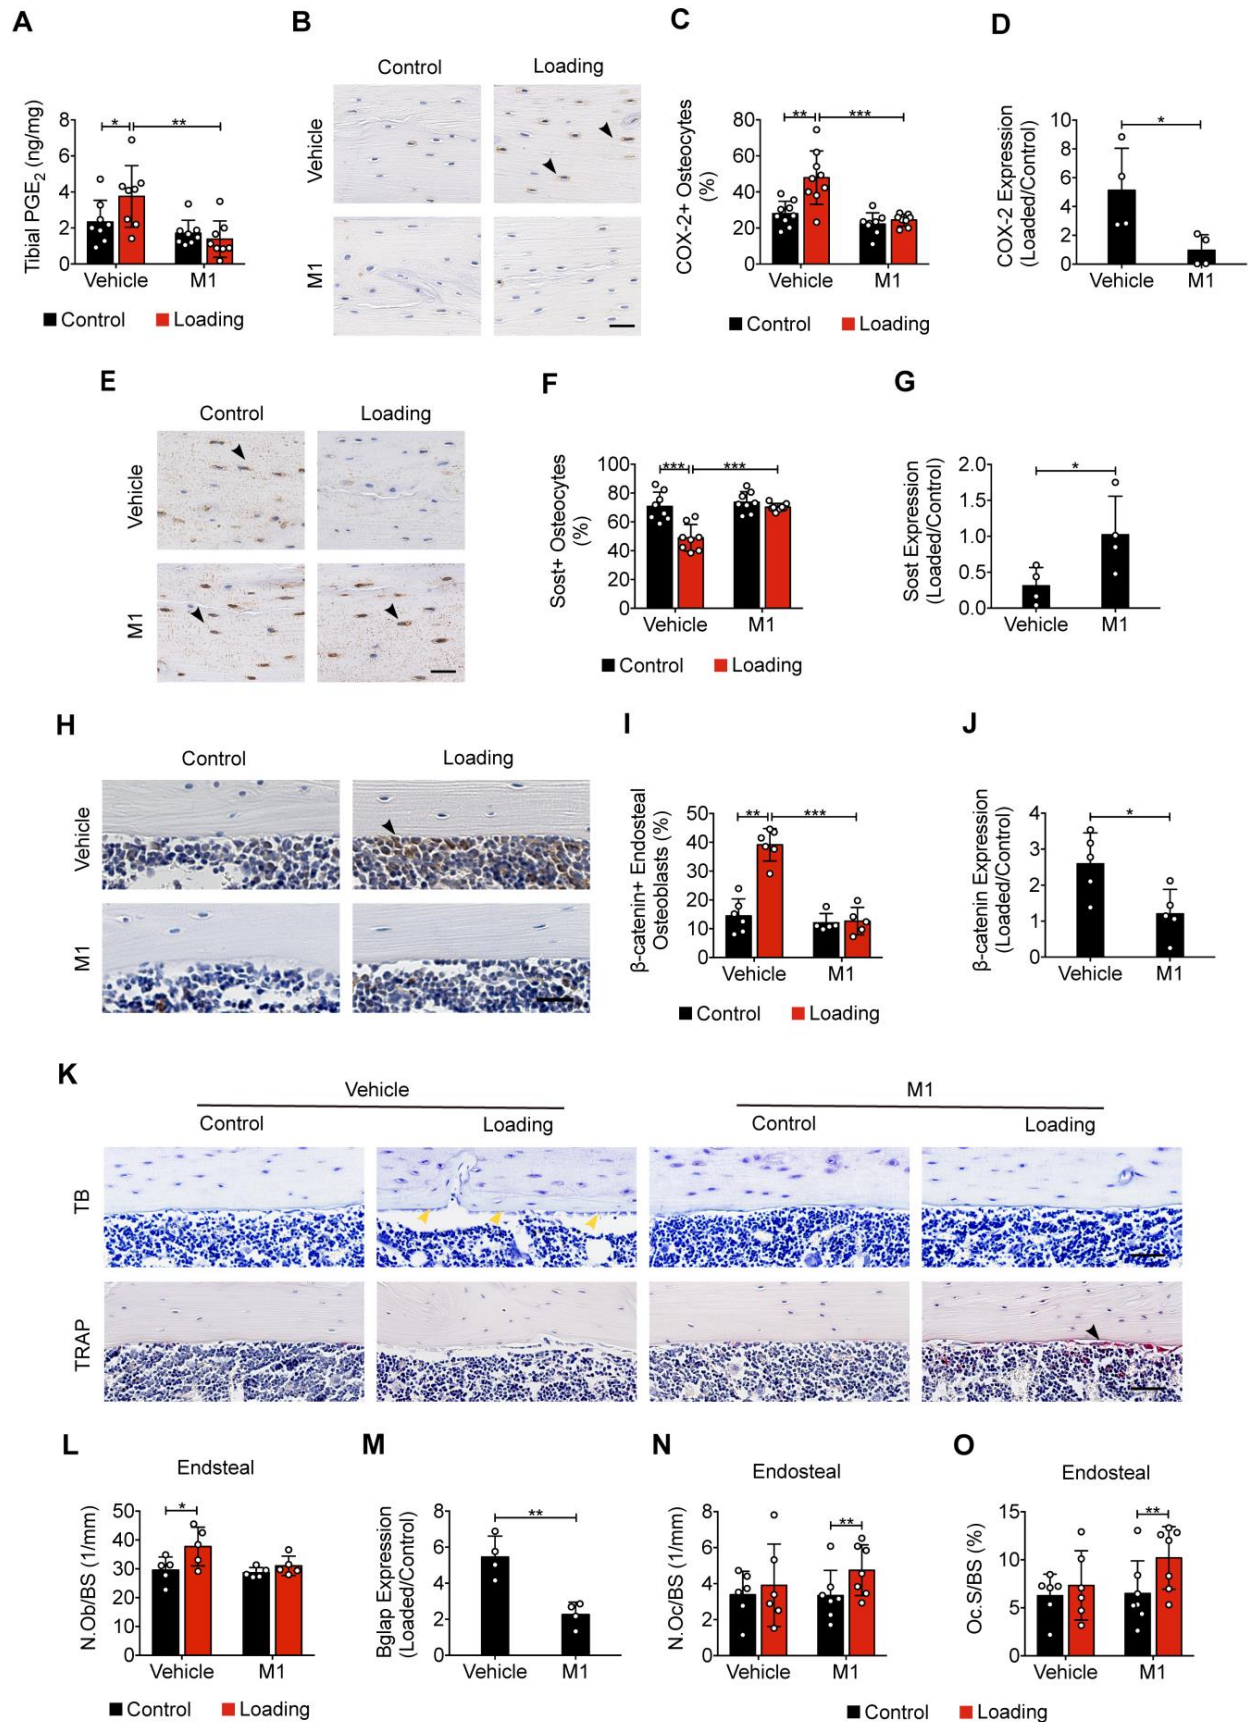

833

**Figure 7. Cx43(M1) impedes the loading-induced increased PGE<sub>2</sub> secretion and osteoblast activity, and decreased osteoclast activity.**

(A) ELISA analysis of PGE<sub>2</sub> in bone marrow-flushed tibial diaphysis after 5 days of mechanical loading in vehicle and Cx43(M1)-treated mice (n=8/group). (B and C) Representative images and quantitative analysis of COX-2-positive osteocytes (yellow arrows) in tibial midshaft cortical bone after 2 weeks of loading in vehicle and Cx43(M1)-treated mice. Scale bar: 30 μm. n=8-9/group. (D) COX-2 mRNA determined by RT-qPCR in bone marrow-flushed tibial diaphysis of vehicle and Cx43(M1)-treated mice. n=4/group. (E-F) Representative images and quantitative analysis of the Sost-positive osteocytes (yellow arrows) in tibial midshaft cortical bone after 2 weeks of mechanical loading in vehicle and Cx43(M1)-treated mice. Scale bar: 30 μm (n=8/group). (G) Sost mRNA determined by RT-qPCR from bone marrow-flushed tibial diaphysis of vehicle and Cx43(M1)-treated mice. n=4/group. (H and I) Representative images and quantitative analysis of the β-catenin positive periosteal cells (black arrows) on tibial midshaft endosteal surface after 2 weeks of loading in vehicle and Cx43(M1)-treated mice. Scale bar: 20 μm; n=5-6/group. (J) β-catenin mRNA determined by RT-qPCR in bone marrow-flushed tibial diaphysis of vehicle and Cx43(M1)-treated mice. n=4/group. (K) Representative images of tibial midshaft endosteal surface stained for toluidine blue (top panel) or TRAP (low panel). The yellow arrows indicate osteoblasts and the black arrows indicate the TRAP-positive osteoclasts. Scale bar: 30 μm. (L) Histomorphometric quantitation of osteoblast per bone perimeter (n=5-7/group). (M) Bglap mRNA determined by RT-qPCR in bone marrow-flushed tibial diaphysis of vehicle and Cx43(M1)-treated mice. n=4/group. (N and O) Histomorphometric quantitation of osteoclast per bone perimeter (N) and osteoclast surface per bone perimeter (O) (n=5-7/group). Data are expressed as mean ± SD. \*, P<0.05; \*\*, P<0.01; \*\*\*, P<0.001. Statistical analysis was performed using paired t-test for loaded and contralateral tibias, unpaired t-test for loaded tibias between vehicle and Cx43(M1)-treated groups.

859 **Figure 8**

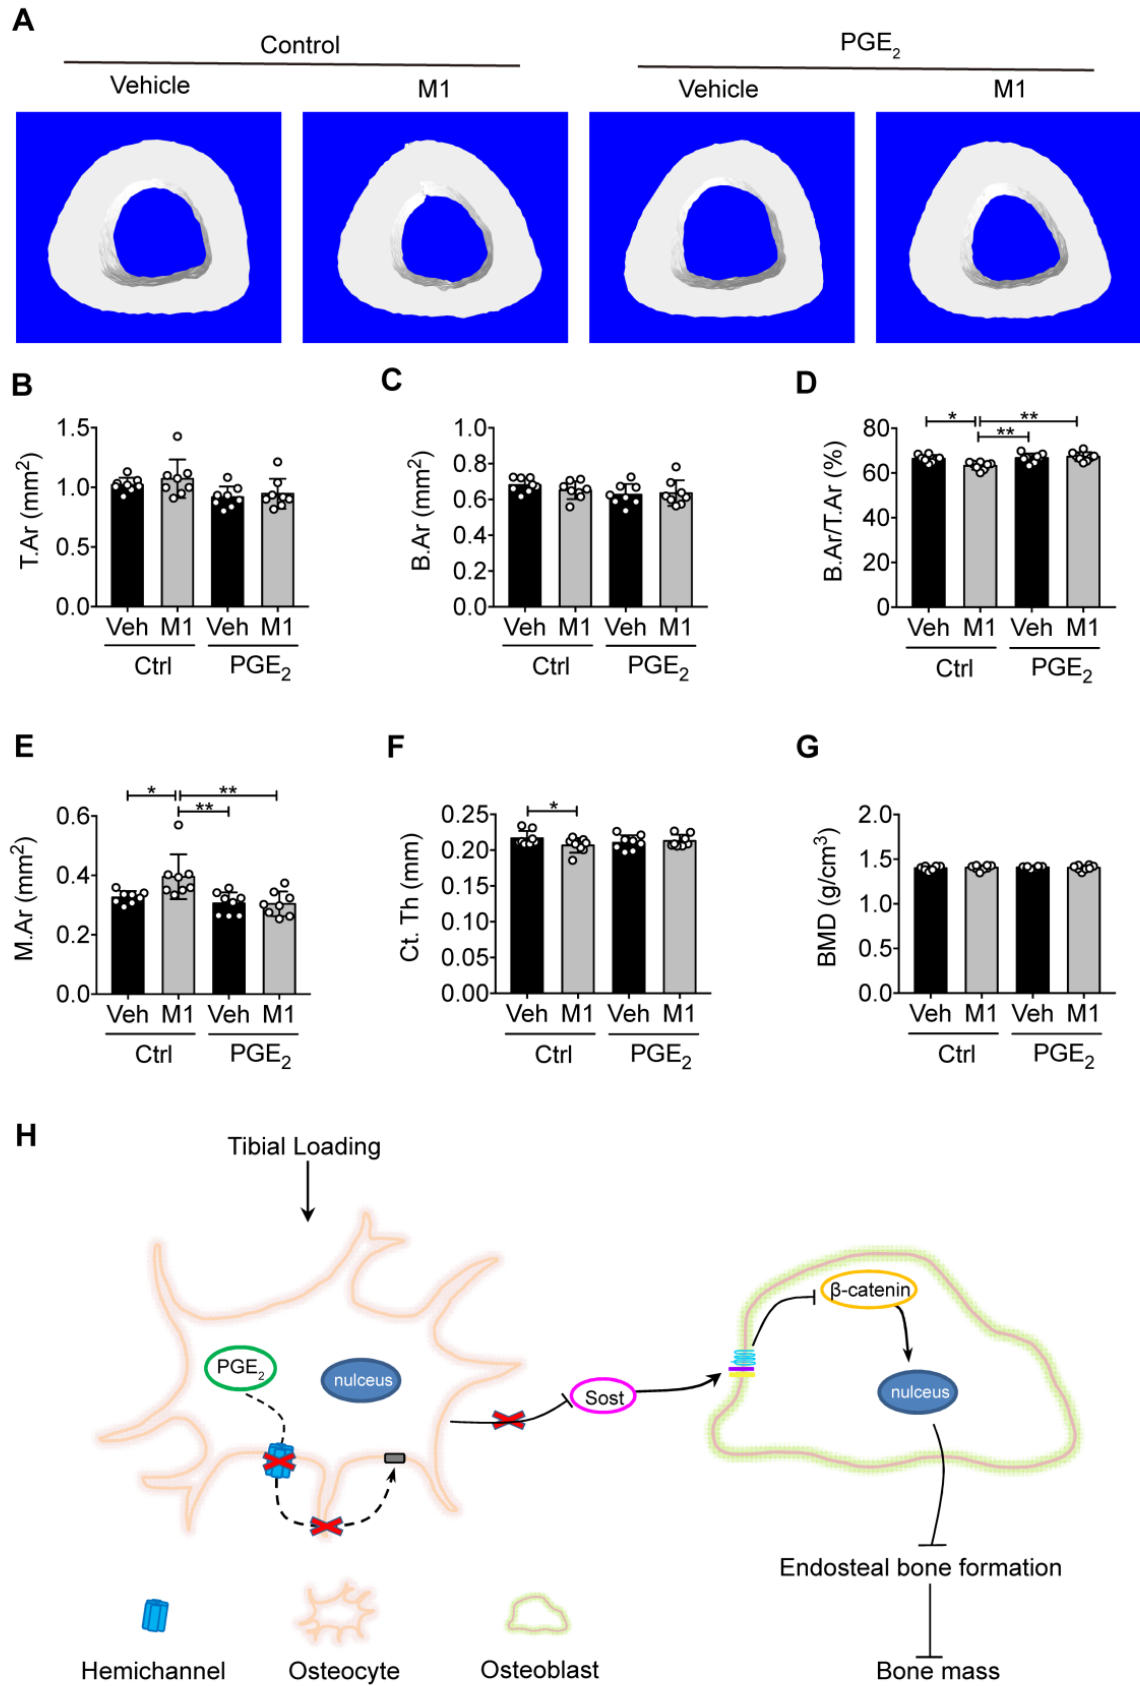

860



861 **Figure 8. PGE<sub>2</sub> rescues the osteogenic response to mechanical loading with the impairment of**  
862 **Cx43 hemichannels in cortical bone. (A)** Representative 3D models of the tibial midshaft cortical  
863 bone (50% site) in vehicle and Cx43(M1)-treated mice treated with 1 mg/kg/day PGE<sub>2</sub> or vehicle  
864 control. **(B-G)**  $\mu$ CT was used to assess tibial midshaft cortical bone; **(B)** total area, **(C)** bone area,  
865 **(D)** bone area fraction, **(E)** bone marrow area, **(F)** cortical thickness, and **(G)** bone mineral density.  
866 n=8/group. Data are expressed as mean  $\pm$  SD. \*, P<0.05; \*\*, P<0.01; \*\*\*, P<0.001. Statistical analysis  
867 was performed using one-way ANOVA with Tukey test. **(H)** Schematic diagram illustrating the  
868 mechanistic roles of osteocytic Cx43 hemichannels in mediating anabolic responses to tibial loading.  
869 Briefly, Cx43 hemichannels mediate the release of PGE<sub>2</sub> by mechanical loading, leading to  
870 suppression of Sost expression with enhanced  $\beta$ -catenin expression and osteogenesis on the  
871 endosteal surface. The inhibition of Cx43 hemichannels impedes the loading-induced PGE<sub>2</sub> secretion  
872 and anabolic function of mechanical loading on bone tissue.

# Figure 1-figure supplement 1

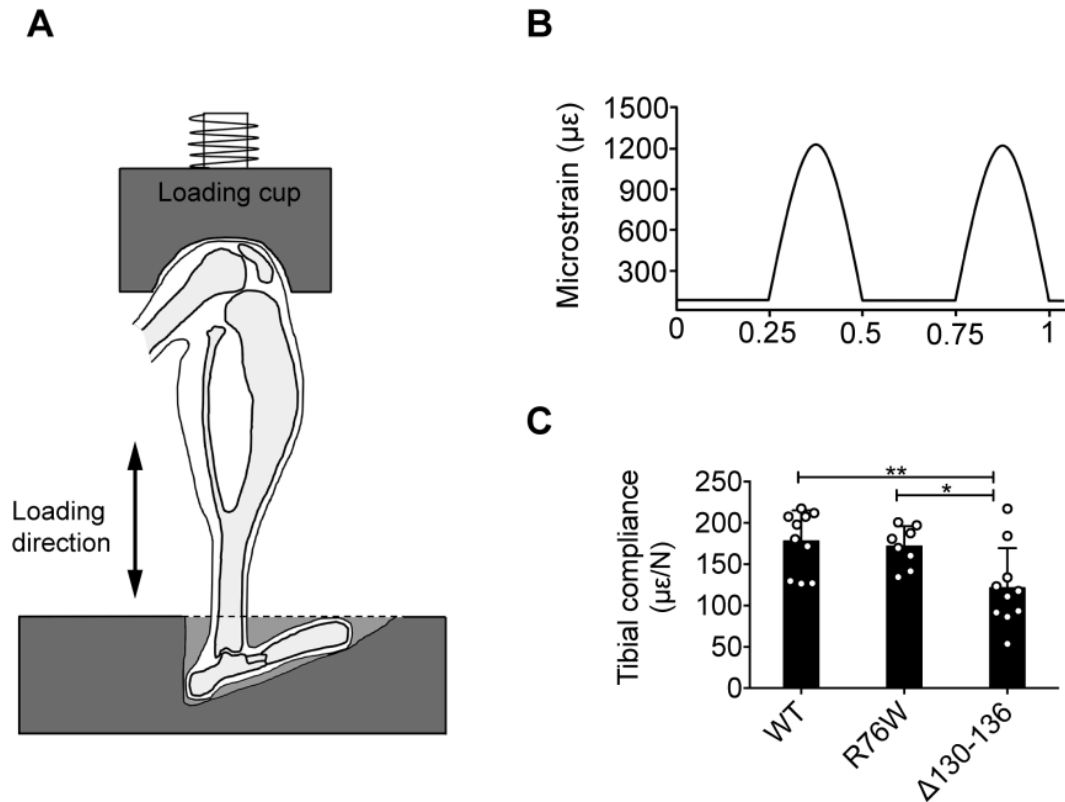

## Figure 1-figure supplement 1. Experimental setup for *in vivo* axial loading.

(A) Diagram of the left tibia positioned at the loading device and the direction of loading. (B) Schematic graph of 1 s of the daily 5 min loading signal. Approximately 1200 microstrain was detected on the medial mid-shaft surface of the tibia. (C) The average compliance of the relationship between applied load and resulting strain on the medial mid-shaft of WT, R76W and  $\Delta 130-136$  mice. n=8-10/group. Data are expressed as mean  $\pm$  SD. \*,  $P < 0.05$ ; \*\*,  $P < 0.01$ . Statistical analysis was performed using one-way ANOVA with Tukey test among groups with different genotypes.

# 884 **Figure 1-figure supplement 2**

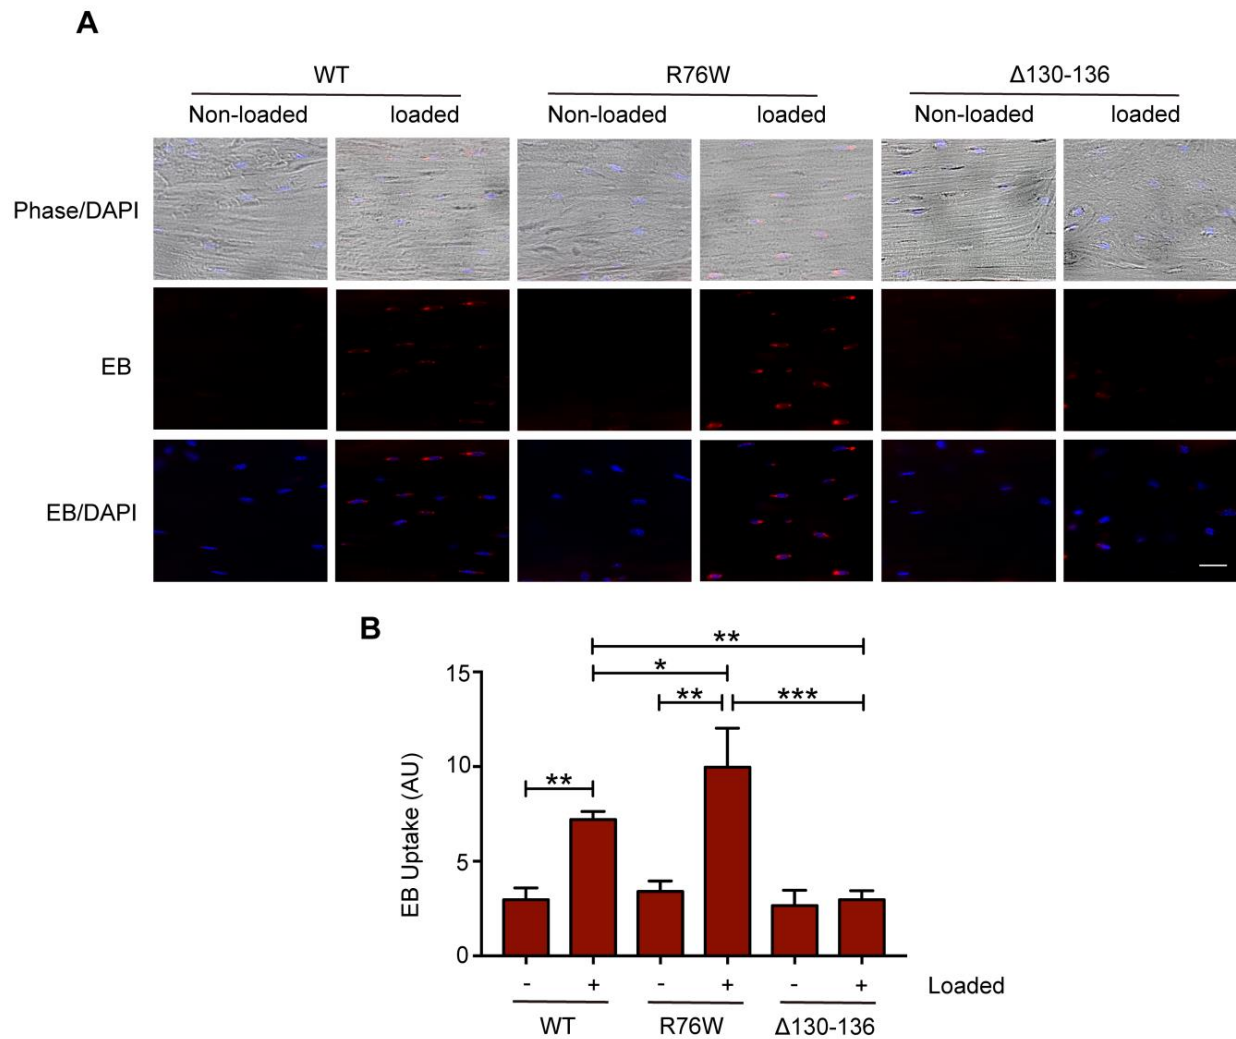

885

886 **Figure 1-figure supplement 2. Hemichannel opening is Inhibited in  $\Delta$ 130-136 mice.**

887 (A) Representative images of Evans blue (EB) dye uptake in control and loaded tibial bone in WT,  
888 R76W and  $\Delta$ 130-136 mice. Scale bar, 60  $\mu$ m. (B) Quantitative analysis of Evans blue (EB) dye  
889 uptake. n=3/group. Data are represented as mean  $\pm$  SD. \*, P<0.05; \*\*, P<0.01; \*\*\*, P<0.001.  
890 Statistical analysis was performed using one-way ANOVA with Tukey test among different groups.

891

892 **Figure 1-figure supplement 3**

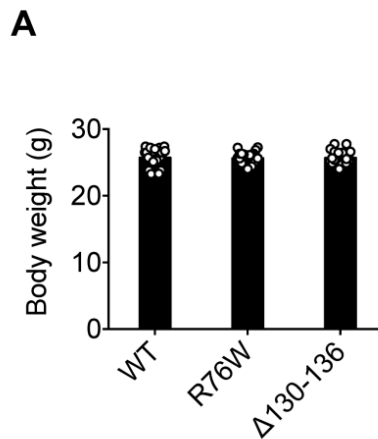

893  
894 **Figure 1-figure supplement 3. Body weights of transgenic mice. (A)** The body weights of WT,  
895 R76W and Δ130-136 mice at the beginning of mechanical loading. n=22/group. Data are expressed  
896 as mean ± SD. Statistical analysis was performed using one-way ANOVA with Tukey test among  
897 different genotypes.  
898

899 **Figure 4-figure supplement 1**

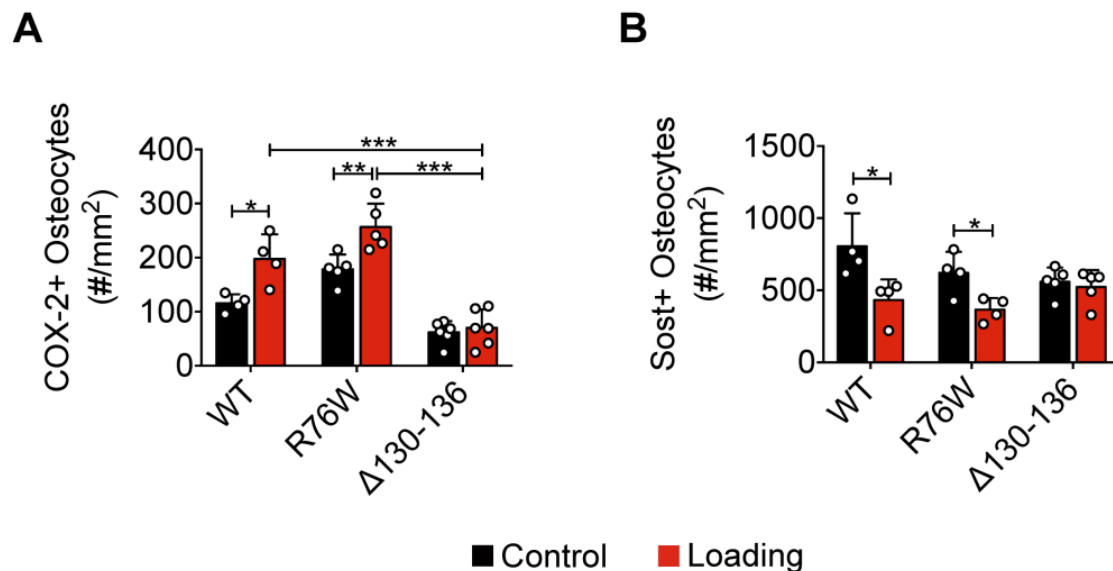

900 **Figure 4-figure supplement 1. Bone marker protein expression in WT, R76W and Δ130-136**  
901 **mice.** (A) Quantitative analysis of the COX-2-positive osteocytes per bone area in tibial midshaft  
902 cortical bone after 2 weeks of mechanical loading in WT, R76W and Δ130-136 mice. n=4-6/group.  
903 (B) Quantitative analysis of the Sost -positive osteocytes per bone area in tibial midshaft cortical  
904 bone after 2 weeks of mechanical loading in WT, R76W and Δ130-136 mice. n=4-6/group. Data are  
905 expressed as mean ± SD. \*, P<0.05; \*\*, P<0.01; \*\*\*, P<0.001. Statistical analysis was performed using  
906 paired t test for loaded and contralateral tibias, or one-way ANOVA with Tukey test for loaded tibias  
907 among groups with different genotypes.  
908  
909

# 910 **Figure 5-figure supplement 1**

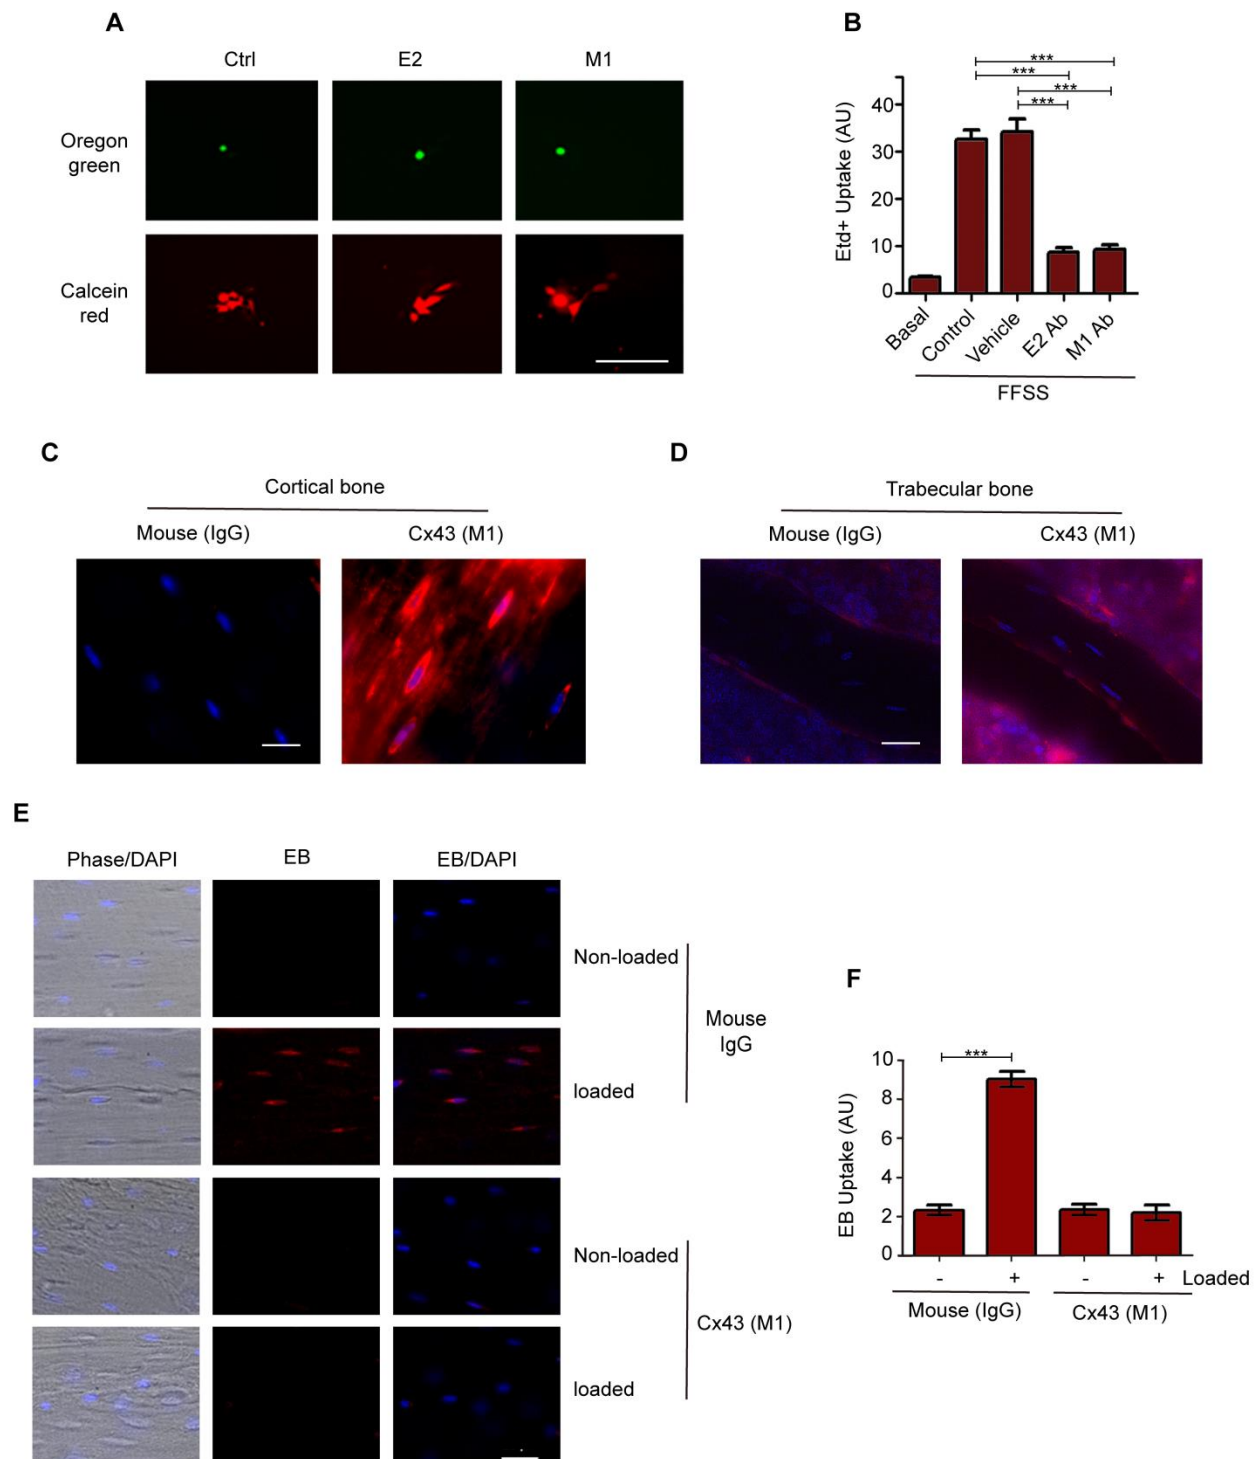

911  
912 **Figure 5-figure supplement 1. Monoclonal antibody of Cx43 inhibits hemichannel opening**  
913 **induced by mechanical stress *in vitro* and *in vivo*.**

914 (A) Parachuting dye coupling assay was conducted to determine gap junction coupling in MLO-Y4  
915 cells loaded with Oregon green 488 BAPTA-AM (Mr: 1751 Da) as a cell tracker probe and calcein  
916 red-orange AM (Mr: 789 Da). Scale bar, 100  $\mu$ m. (B) MLO-Y4 cells were preincubated with

Cx43(E2), Cx43(M1), PBS (vehicle) or rhodamine-conjugated anti-mouse IgG (control) and then subjected to fluid flow shear stress (FFSS) (8 dynes/cm<sup>2</sup>) for 10 min and followed by ethidium bromide (Etd<sup>+</sup>) dye uptake assay. n=4/group. **(C and D)** Representative images of Cx43(M1) detected with rhodamine-conjugated anti-mouse IgG in tibial midshaft cortical bone and trabecular bone. Bar, 50 μm. **(E)** Representative images of Evans blue (EB) dye uptake in control and tibial loaded bone in the absence or presence of Cx43(M1) antibody. Scale bar, 40 μm. **(F)** Quantitative analysis of Evans blue (EB) dye uptake. n=3/group. Data are expressed as mean ± SD. \*, P<0.05; \*\*, P<0.01; \*\*\*, P<0.001. Statistical analysis was performed using one-way ANOVA with Tukey test among different groups.

927 **Figure 5-figure supplement 2**

**A**

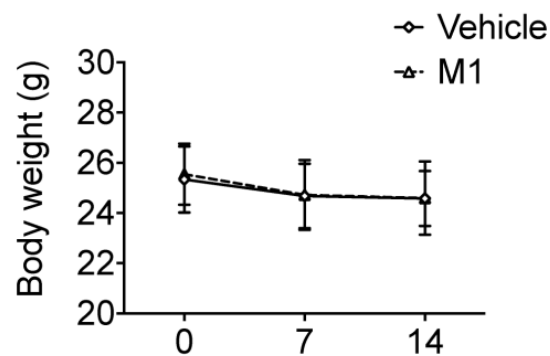

928

929 **Figure 5-figure supplement 2. Body weights of mice during 2 weeks of tibial loading. (A)**

930 Weekly body weights of vehicle and Cx43(M1)-treated groups. n=18/group. Data are expressed as  
931 mean  $\pm$  SD. Statistical analysis was performed using one-way ANOVA with Tukey test among  
932 different genotypes.

933



# 934 **Figure 7-figure supplement 1**

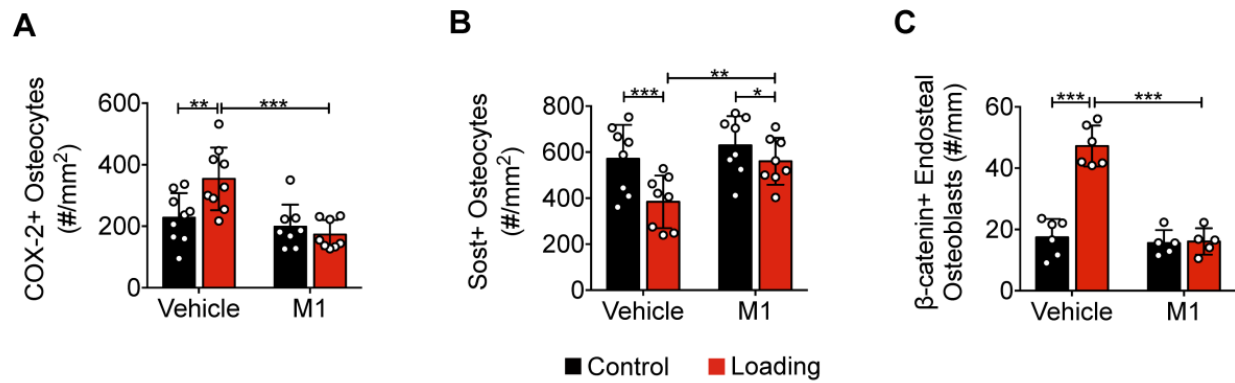

935  
936 **Figure 7-figure supplement 1. Bone marker protein expression in vehicle- and**  
937 **Cx43(M1)-treated mice.**

938 (A, B) Quantitative analysis of the COX-2-positive or Sost-positive osteocytes per bone area in tibial  
939 midshaft cortical bone after 2 weeks of loading in vehicle and Cx43(M1)-treated mice. n=8-9/group.  
940 (C) Quantitative analysis of the β-catenin-positive osteoblasts per bone perimeter in tibial midshaft  
941 cortical bone after 2 weeks of mechanical loading in vehicle and Cx43(M1)-treated mice.  
942 n=4-6/group. Data are expressed as mean ± SD. \*, P<0.05; \*\*, P<0.01; \*\*\*, P<0.001. Statistical  
943 analysis was performed using paired t test for loaded and contralateral tibias, unpaired t test for  
944 loaded tibias between vehicle- and Cx43(M1)-treated groups.

945

946 **Figure 8-figure supplement 1**

**A**

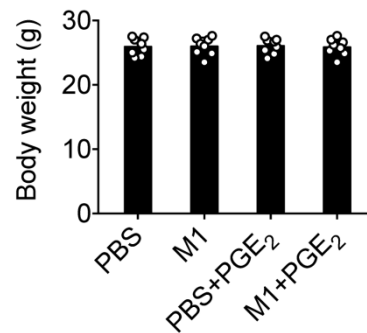

947

948 **Figure 8-figure supplement 1. Body weights of mice of vehicle- and Cx43(M1)-treated mice**  
 949 **treated with 1mg/kg/day PGE2 or vehicle control.**

950 (A) The body weights of vehicle- and Cx43(M1)-treated mice treated with 1mg/kg/day PGE<sub>2</sub> or  
 951 vehicle control at the beginning of mechanical loading. n=8/group. Data are expressed as mean  $\pm$  SD.  
 952 Statistical analysis was performed using one-way ANOVA with Tukey test among different  
 953 genotypes.

954

# 955 **Figure 8-figure supplement 2**

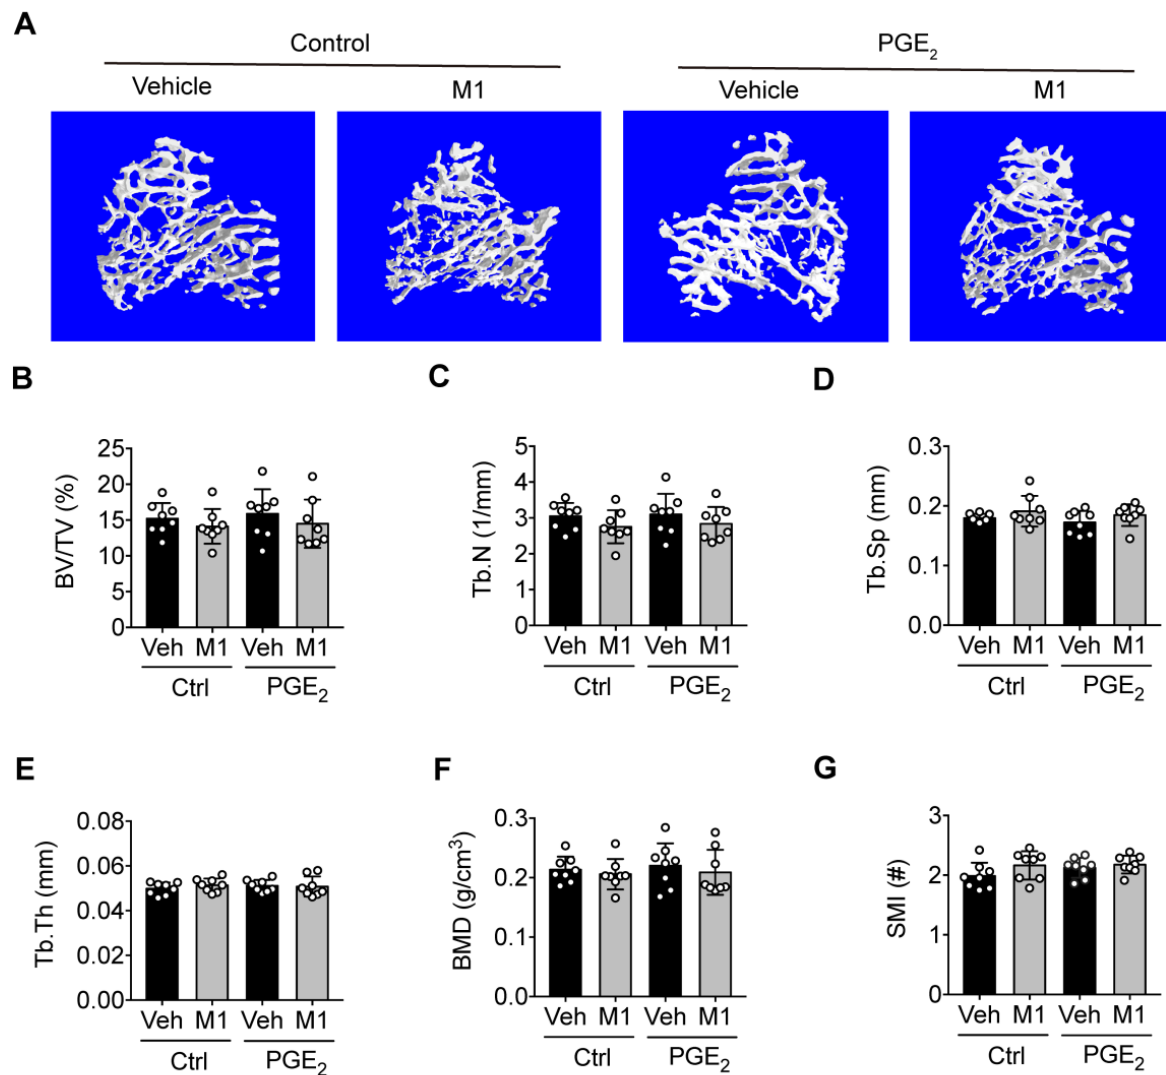

## 956 **Figure 8-figure supplement 2. PGE<sub>2</sub> does not exert additional trabecular osteogenic response to** 957 **mechanical loading.**

958 (A) Representative 3D models of metaphyseal trabecular bone in vehicle and Cx43(M1)-treated mice

959 treated with 1 mg/kg/day PGE<sub>2</sub> or vehicle control. (B-G)  $\mu$ CT was used to assess tibial midshaft

960 cortical bone; (B) bone volume fraction, (C) trabecular number, (D) trabecular separation, (E)

961 trabecular thickness, (F) bone mineral density and (G) structure model index. n=8/group. Data are

962 expressed as mean  $\pm$  SD. \*, P<0.05; \*\*, P<0.01; \*\*\*, P<0.001. Statistical analysis was performed

963 using one-way ANOVA with Tukey test among different groups.

- 970 **Figure 1-Source Data 1.** Trabecular micro-CT data of transgenic and wild-type mice.
- 971 **Figure 1-figure supplement 1-source data 1.** Raw data of compliances for Figure 1-figure  
972 supplement 1C.
- 973 **Figure1-figure supplement 2-source data 1.** Raw data of dye uptake for Figure 1-figure  
974 supplement 2B.
- 975 **Figure1-figure supplement 3-source data 1.** Raw data of body weight for Figure1-figure  
976 supplement 3A.
- 977 **Figure 2-Source Data 1.** Cortical micro-CT data of transgenic and wild-type mice.
- 978 **Figure 3-Source Data 1.** Raw data of periosteal and endosteal bone formation of transgenic and  
979 wild-type mice.
- 980 **Figure 4-Source Data 1.** Raw data of PGE<sub>2</sub> level for Figure 4A.
- 981 **Figure 4-Source Data 2.** Raw data of immunohistochemical, TRAP and toluidine blue staining of  
982 transgenic and wild-type mice.
- 983 **Figure 4-Source Data 3.** Raw data of RT-qPCR of transgenic and wild-type mice.
- 984 **Figure 4-figure supplement 1-source data 1.** Raw data of COX-2 and Sost quantification for  
985 Figure 4-figure supplement 1A, B.
- 986 **Figure 5-Source Data 1.** Micro-CT data of vehicle and Cx43(M1)-treated mice.
- 987 **Figure 5-Source Data 2.** Three-point bending data of vehicle and Cx43(M1)-treated mice.
- 988 **Figure 5-figure supplement 1-source data 1** Raw data of dye uptake for Figure 5-figure  
989 supplement 1B and F.
- 990 **Figure 5-figure supplement 2-source data 1.** Raw data of body weight for Figure 5-figure  
991 supplement 2A.
- 992 **Figure 6-Source Data 1.** Raw data of periosteal and endosteal bone formation of vehicle and  
993 Cx43(M1)-treated mice.
- 994 **Figure 7-Source Data 1.** Raw data of PGE<sub>2</sub> level for Figure 7A.
- 995 **Figure 7-Source Data 2.** Raw data of immunohistochemical, TRAP and toluidine blue staining of  
996 vehicle and Cx43(M1)-treated mice.
- 997 **Figure 7-Source Data 3.** Raw data of RT-qPCR of vehicle and Cx43(M1)-treated mice.
- 998 **Figure 7-figure supplement 1-source data 1.** Raw data of COX-2 Sost and  $\beta$ -catenin quantification  
999 for Figure 7-figure supplement 1A-C.

1000 **Figure 8-Source Data 1.** Cortical micro-CT data of vehicle and Cx43(M1)-treated mice treated with  
 1001 1 mg/kg/day PGE2 or vehicle control.

1002 **Figure 8-figure supplement 1-source data 1.** Raw data of body weight for Figure8-figure  
 1003 supplement 1A.

1004 **Figure 8-figure supplement 2-source data 1.** Trabecular micro-CT data of vehicle and  
 1005 Cx43(M1)-treated mice treated with 1 mg/kg/day PGE2 or vehicle control.
